1 **Flagellum and toxin phase variation impacts intestinal colonization and disease**  
2 **development in a mouse model of *Clostridioides difficile* infection**

3

4 Dominika Trzilova, Mercedes A. H. Warren, Nicole C. Gadda, Caitlin L. Williams, and Rita  
5 Tamayo\*

6

7 Department of Microbiology and Immunology, University of North Carolina at Chapel Hill

8 School of Medicine, Chapel Hill, NC, USA

9

10

11

12 \*Corresponding Author

13 125 Mason Farm Rd, CB #7290

14 Chapel Hill, NC 27599-7290

15 Email: rita\_tamayo@med.unc.edu

16 (919) 843-2864

17

18

19

20

21 **KEYWORDS:** phenotypic heterogeneity, motility, flagella, toxin, mouse, hamster

## 22 **Abstract**

23 *Clostridioides difficile* is a major nosocomial pathogen that can cause severe, toxin-mediated  
24 diarrhea and pseudomembranous colitis. Recent work has shown that *C. difficile* exhibits  
25 heterogeneity in swimming motility and toxin production *in vitro* through phase variation by  
26 site-specific DNA recombination. The recombinase RecV reversibly inverts the flagellar switch  
27 sequence upstream of the *flgB* operon, leading to the ON/OFF expression of flagellum and toxin  
28 genes. How this phenomenon impacts *C. difficile* virulence *in vivo* remains unknown. We  
29 identified mutations in the right inverted repeat that reduced or prevented flagellar switch  
30 inversion by RecV. We introduced these mutations into *C. difficile* R20291 to create strains with  
31 the flagellar switch “locked” in either the ON or OFF orientation. These mutants exhibited a loss  
32 of flagellum and toxin phase variation during growth *in vitro*, yielding precisely modified  
33 mutants suitable for assessing virulence *in vivo*. In a hamster model of acute *C. difficile* infection,  
34 the phase-locked ON mutant caused greater toxin accumulation than the phase locked OFF  
35 mutant but did not differ significantly in the ability to cause acute disease symptoms. In contrast,  
36 in a mouse model, preventing flagellum and toxin phase variation affected the ability of *C.*  
37 *difficile* to colonize the intestinal tract and to elicit weight loss, which is attributable to  
38 differences in toxin production during infection. These results show that the ability of *C. difficile*  
39 to phase vary flagella and toxins influences colonization and disease development and suggest  
40 that the phenotypic variants generated by flagellar switch inversion have distinct capacities for  
41 causing disease.

## 42 **Introduction**

43           Many bacterial species employ phase variation to generate phenotypic heterogeneity  
44 within a clonal population. Bacteria frequently encounter selective pressures in their  
45 environment, and phenotypic heterogeneity helps ensure survival by creating subpopulations that  
46 are differentially equipped to overcome these pressures.<sup>1</sup> Phase variation typically affects the  
47 production of surface factors that directly interface with the bacterium's environment, such as  
48 flagella, pili, and exopolysaccharides. Both mucosal pathogens and commensal species employ  
49 phase variation to balance the fitness advantages conferred by these structures with the costs of  
50 producing them; in a host environment, the ability to phase vary can promote immune evasion  
51 and persistence in the host.<sup>2</sup> Phase variation can be achieved by multiple epigenetic and genetic  
52 mechanisms, including DNA modification by methylation, slipped-strand mispairing,  
53 homologous recombination, and site-specific recombination.<sup>1, 3</sup>

54           In many pathogens including *Acinetobacter baumannii*, *Bordetella bronchiseptica*, and  
55 *Streptococcus pneumoniae*, host selective pressures can substantially affect the composition of a  
56 phase-variable bacterial population during infection.<sup>4-11</sup> All three of these pathogens can form  
57 distinct subpopulations differentially equipped for survival in disparate environments. However,  
58 determining the importance of phase variation (rather than the phase-variable trait) in  
59 pathogenesis can be challenging. Studies in which phase variation has been eliminated to create  
60 “phase-locked” mutants have been valuable for determining the impact of phase variation itself.  
61 In *B. bronchiseptica*, phase-locked Bvg<sup>+</sup> and Bvg<sup>-</sup> strains were created by either deleting *bvgS*  
62 encoding the sensor kinase in the BvgAS system (Bvg<sup>-</sup> phase) or mutating BvgS to be  
63 constitutively active (Bvg<sup>+</sup> phase).<sup>4</sup> Phase-locked strains have also been created by mutating  
64 site-specific recombinases that mediate inversion of one or multiple loci, e.g., Mpi modulating

65 polysaccharide production in *Bacteroides fragilis*.<sup>12</sup> Finally, in uropathogenic *Escherichia coli*  
66 (UPEC), mutation of inverted repeats critical for site-specific recombination generated  
67 populations unable to phase vary the production of fimbriae.<sup>13, 14</sup> These studies led to improved  
68 understanding of host-microbe interactions and the importance of phase variation in fitness of  
69 bacterial pathogens in diverse host environments.

70 *Clostridioides difficile* is a gram-positive, spore-forming anaerobe that is currently the  
71 leading cause of antibiotic-associated diarrheal disease and one of the most common causes of  
72 nosocomial infection. *C. difficile* infection (CDI) is primarily mediated by two toxins, TcdA and  
73 TcdB, that glucosylate and inactivate Rho family GTPases leading to perturbation of the actin  
74 cytoskeleton.<sup>15-17</sup> During infection, TcdA and TcdB disrupt the intestinal epithelial barrier  
75 resulting in inflammation, immune cell recruitment, and development of diarrheal symptoms,<sup>18</sup>  
76 and evidence suggests both toxins are important for disease development in animal models.<sup>19-21</sup>

77 Several recent studies have shown that *C. difficile* exhibits substantial phenotypic  
78 heterogeneity via phase variation by site-specific DNA recombination.<sup>22-26</sup> This mechanism of  
79 phase variation is mediated by serine or tyrosine DNA recombinases that recognize sequences  
80 containing inverted repeats and catalyze strand exchange, leading to inversion of the intervening  
81 DNA sequence.<sup>27, 28</sup> Eight DNA sequences that can undergo inversion have been identified in *C.*  
82 *difficile*, though individual strains may contain only a subset.<sup>24, 29</sup> Three of these sequences have  
83 been experimentally demonstrated to modulate expression of adjacent genes leading to phase  
84 variation of the encoded factors: the cell wall protein CwpV,<sup>22, 30</sup> flagella,<sup>23, 31</sup> and the CmrRST  
85 signal transduction system.<sup>26</sup>

86 *C. difficile* flagella are required for swimming motility and contribute to adherence to  
87 intestinal epithelial cells, colonization, and virulence in animal models of infection.<sup>32-35</sup> Flagellar

88 genes in *C. difficile* are organized in multiple operons that are expressed in a hierarchical manner  
89 coordinated by the sigma factor SigD (also known as FliA and  $\sigma^{28}$ ).<sup>36-39</sup> SigD also promotes  
90 expression of toxin genes by activating transcription of *tcdR*, which encodes a direct positive  
91 regulator of *tcdA* and *tcdB*, linking toxin production to flagellar gene transcription.<sup>38-40</sup>  
92 Consistent with these findings, phase variation of flagella results in concomitant phase variation  
93 of toxin biosynthesis *in vitro*.<sup>23, 25, 41</sup> This phase variation occurs as a result of inversion of a  
94 DNA sequence, termed the flagellar (*flg*) switch, upstream of the *flgB* coding sequence and  
95 mapping to the 5' untranslated region of the *flgB* operon.<sup>23</sup> The flagellar switch is flanked by  
96 imperfect inverted repeats and contains regulatory features that control gene expression by a  
97 mechanism dependent on Rho-mediated transcription termination.<sup>41</sup> This process generates a  
98 phenotypically heterogeneous population consisting of *flg* ON cells that are motile and toxigenic  
99 and *flg* OFF cells that are aflagellate, nonmotile, and attenuated for toxin production.<sup>23, 41</sup>

100 The roles of flagella and toxins in *C. difficile* pathogenesis are well studied, but the  
101 importance of the heterogeneity generated by their phase variation to disease development is  
102 unknown. The goal of this study was to analyze the effects of preventing phase variation of the  
103 flagellar switch on *C. difficile* physiology and virulence. Phase-locked 'ON' and 'OFF' mutants  
104 were previously generated by eliminating the site-specific tyrosine recombinase, RecV, and  
105 identifying isolates with the flagellar switch locked in either orientation.<sup>22</sup> However, RecV is  
106 required for inversion of three other sequences (upstream of *cwpV*, *cmrRST*, and  
107 CDR20291\_0963) and influences inversion of two additional sequences (upstream of  
108 CDR20291\_0685 and CDR20291\_1514).<sup>22-24, 26, 42</sup> The broad regulation exerted by RecV thus  
109 results in pleiotropic effects that limit the utility of *recV* mutants for studying the impact of  
110 flagellum and toxin phase variation. To circumvent these drawbacks, in this study we instead

111 created phase-locked strains by mutating residues in the right inverted repeat predicted to be  
112 critical for flagellar switch inversion. We identified mutations that cause a partial or full  
113 attenuation of flagellar switch inversion, and *in vitro* characterization of these mutants showed a  
114 corresponding reduction or loss of flagellum and toxin phase variation. The locked ON and OFF  
115 mutants were assessed in hamster and mouse models of CDI for altered colonization, virulence  
116 properties, and toxin production. In a hamster model of acute CDI, the phase-locked mutants did  
117 not differ from wildtype in ability to cause disease and showed a modest defect in colonization,  
118 despite significant differences in toxin accumulation in the cecum between the locked-ON and -  
119 OFF mutants. In contrast, in a mouse model of CDI, the locked-ON mutant elicited significantly  
120 greater weight loss and maintained higher colonization levels compared to wildtype and the  
121 locked-OFF mutant. Differences were attributable at least in part to toxin levels achieved by  
122 these strains during infection. These results indicate that the capacity of *C. difficile* to phase vary  
123 flagellum and toxin biosynthesis during infection impacts its ability to colonize and cause  
124 disease *in vivo*.

125

## 126 **Results**

### 127 **Identification of nucleotides in the right inverted repeat of the flagellar switch that are** 128 **important for inversion**

129 To determine the role of flagellum and toxin phase variation in *C. difficile* infection, we  
130 aimed to create mutants incapable of inverting the flagellar switch while avoiding the pleiotropic  
131 effects of inactivating *recV*. We focused on the flagellar switch inverted repeats (IRs), as these  
132 regions are typically directly recognized by the site-specific recombinase and important for  
133 switch inversion. To identify candidate nucleotides in the IRs required for inversion of the

134 flagellar switch by RecV, we performed an alignment of the IRs of the six RecV-invertible  
135 sequences in *C. difficile*. Although the invertible sequences differ in length and nucleotide  
136 sequence, the IRs share some sequence similarity suggesting that specific residues are important  
137 for interacting with RecV. Sequence conservation is strongest among the left inverted repeats  
138 (LIRs) of five invertible sequences and right inverted repeat (RIR) of the *cwpV* switch; lower  
139 identity is apparent among the respective RIRs (and LIR of *cwpV*) (Figure 1A).

140 We recently showed that the flagellar switch impacts gene expression in a mechanism  
141 acting after transcription initiation and occurring within the leader region of the *flgB* operon  
142 mRNA. While not fully elucidated, this regulation is dependent on Rho-mediated transcription  
143 termination that preferentially impacts *flg* OFF mRNA, a mechanism that requires Rho to  
144 interact with the mRNA either within or upstream of the flagellar switch.<sup>41</sup> To minimize the risk  
145 of interfering with Rho-mediated regulation, we chose to mutate the RIR downstream of the  
146 flagellar switch.

147 Because the starting orientation of an invertible element can impact the efficiency of  
148 inversion by a recombinase, both *flg* ON and *flg* OFF versions were created for each mutation.  
149 Three sites were selected for mutagenesis. First, we deleted 18 of the 21 bp of the *flg* RIR to  
150 create *flg*- $\Delta$ RIR ON and OFF mutant sequences, which we anticipated would prevent switch  
151 inversion;<sup>43</sup> however, the larger deletion presents greater risk of altering Rho-mediated  
152 regulation. Second, we chose three highly conserved CAA nucleotides in the *flg* RIR for  
153 substitution with GTT to create *flg*-3sub ON and OFF mutant sequences (Figure 1A). Third, we  
154 targeted the previously identified nucleotide where the DNA strand is cleaved by RecV to  
155 catalyze strand exchange (Figure 1A).<sup>24</sup> This residue and the two adjacent nucleotides were  
156 deleted to create *flg*- $\Delta$ 3 ON and OFF mutant sequences.

157           Due to the challenges of creating unmarked chromosomal mutations in *C. difficile*, we  
158 first evaluated the effects of the RIR mutations on flagellar switch inversion using a previously  
159 described method employing *E. coli* as a heterologous host.<sup>22, 23</sup> In this assay, the *E. coli* strains  
160 bear two plasmids. One plasmid contains *recV* under the control of an anhydrotetracycline  
161 (ATc)-inducible promoter, and the other plasmid contains the target flagellar switch sequence.<sup>23</sup>  
162 Primers specific to each orientation of the switch are then used for detection by PCR. Each of  
163 these plasmid-borne target sequences was co-transformed into *E. coli* with pRecV, and the  
164 resulting strains were grown with or without ATc to induce *recV* expression then subjected to  
165 PCR with orientation-specific primers. As observed previously, only the starting orientation of  
166 the flagellar switch sequence was detected in the absence of *recV* induction with ATc for both *flg*  
167 ON and *flg* OFF constructs (Figure 1B, C, left). Upon induction with ATc, inversion of the wild-  
168 type flagellar switch sequence was detected, evident by the appearance of the *flg* OFF product  
169 from the *flg* ON target (Figure 1B, right) and the *flg* ON product from the *flg* OFF target (Figure  
170 1C, right). The *flg*-3sub mutation appeared to reduce but not eliminate inversion by RecV, as the  
171 product for the inverted sequence remained detectable (Figure 1B, C, right). In contrast, no  
172 inversion was detected for the *flg*- $\Delta$ RIR and *flg*- $\Delta$ 3 target sequences, regardless of the starting  
173 orientation of the flagellar switch (Figure 1B, C). The starting orientation of the flagellar switch  
174 did not affect invertibility of any of the target sequences by RecV in this assay. These data  
175 suggest that the *flg*- $\Delta$ RIR and *flg*- $\Delta$ 3 mutations in the RIR render the flagellar switch into a  
176 “locked” state, while the *flg*-3sub mutation impairs flagellar switch inversion.

177

178 **Loss of flagellar switch inversion in the RIR mutants leads to *C. difficile* phase-locked for**  
179 **motility and toxin production**



180 We next sought to determine the effects of the RIR mutations on flagellar switch  
181 inversion and phase variation in *C. difficile*. We used allelic exchange to create six R20291  
182 mutant strains: *flg-3sub* ON, *flg-ΔRIR* ON, *flg-Δ3* ON, *flg-3sub* OFF, *flg-ΔRIR* OFF, and *flg-Δ3*  
183 OFF. The process of generating strains with these precise mutations was facilitated by first  
184 deleting the 5'UTR region, then restoring that region with the desired nucleotide changes  
185 incorporated. These mutants were confirmed to have the expected flagellar switch orientation  
186 using quantitative PCR with orientation-specific primers (OS-qPCR) (Figure 1D). Each mutant  
187 contained the flagellar switch exclusively in the anticipated ON or OFF orientation ( $0 \pm 0$  % *flg*  
188 OFF for the *flg* ON mutants,  $100 \pm 0$  % *flg* OFF for the *flg* OFF mutants) after growth in rich,  
189 liquid medium, in contrast to wildtype which exhibited heterogeneity ( $0.6 \pm 0.3$  % *flg* OFF).

190 To establish that these genetically locked mutants are also phenotypically locked, we first  
191 tested these strains in soft agar swimming motility assays. We found that, as expected, the  
192 wildtype and *flg* ON mutant strains (*flg-ΔRIR*, *flg-Δ3*, and *flg-3sub*) exhibited comparable  
193 motility (Figure 2A, B). In contrast, examination of the equivalent mutations in the *flg* OFF  
194 background revealed distinct effects of the mutations on flagellar phase variation. The *flg-ΔRIR*  
195 OFF and *flg-Δ3* OFF mutants remained non-motile, equal to the nonmotile *sigD*-null control,  
196 indicating that these mutations prevent phase variation. However, the *flg-3sub* OFF mutant  
197 exhibited motility in this assay. These results are consistent with the data in Figure 1 indicating  
198 that the 3sub mutation reduces but does not eliminate flagellar switch inversion, and they suggest  
199 that the motility medium presented a selective pressure for the *flg* ON variants.

200 Because toxin gene expression is linked to transcription of the *flgB* operon via SigD,<sup>38, 39</sup>  
201 we evaluated toxin production in the *flg* RIR mutant strains. By immunoblot, the *flg-ΔRIR*, *flg-*  
202 *Δ3*, and *flg-3sub* ON strains produced TcdA at levels equivalent to the wildtype parent after

203 growth in TY broth (Figure 2C). TcdA was undetectable in the three *flg* OFF mutants, similar to  
204 the *sigD*-null control. Using a Vero cell rounding assay, which detects the activities of TcdA and  
205 TcdB, to quantify the toxin produced by these strains in broth culture, we found that the three *flg*  
206 OFF mutants and *sigD* control cultures contained significantly lower toxin titers than the *flg* ON  
207 mutants and wildtype (Figure 2C). Therefore, mutations in *flg* RIR that impede inversion of the  
208 flagellar switch concomitantly impact toxin production *in vitro*.

209 While a swimming motility assay can show the lack of flagellar switch inversion from  
210 OFF to ON in non-motile bacteria, it cannot detect inversion from ON to OFF in motile bacteria  
211 (including the *flg* ON RIR mutants) because the motile phenotype dominates in this assay. As an  
212 alternative way to determine whether the *flg*-3sub, *flg*- $\Delta$ RIR and *flg*- $\Delta$ 3 ON mutants are capable  
213 of inversion, we assessed the effect of *recV* overexpression on flagellar switch inversion from  
214 ON to OFF using qPCR with orientation-specific primers (OS-qPCR). As seen previously, the  
215 wild-type R20291 populations were skewed toward the *flg* ON orientation, with less than 5% *flg*  
216 OFF cells, and expression of *recV* increased *flg* switch inversion resulting in a larger *flg* OFF  
217 population (Figure 2D).<sup>23</sup> The three *flg* ON RIR mutants bearing vector, with *recV* expressed at  
218 its natural levels, consisted of only *flg* ON bacteria (0% *flg* OFF, n=4). Despite *recV*  
219 overexpression, no *flg* OFF bacteria were detected in the *flg*- $\Delta$ RIR and *flg*- $\Delta$ 3 ON mutants.  
220 However, overexpression of *recV* increased the subpopulation with the OFF orientation in the  
221 *flg*-3sub ON mutant, though potentially at a lower frequency than in the wildtype. Together with  
222 the *flg* OFF motility data and the *E. coli* inversion experiments, these results show that deletion  
223 of the RIR ( $\Delta$ RIR) or three nucleotides at the site of recombination ( $\Delta$ 3) results in complete loss  
224 of flagellar switch inversion and phase variation, while a substitution of three conserved residues  
225 (3sub) reduces the frequency of inversion.

226

227 **Preventing flagellar switch inversion affects colonization and toxin accumulation in a**  
228 **hamster model of infection**

229 *In vitro*, restricting inversion of the flagellar switch affects both motility and toxin  
230 production. Because both characteristics are important during CDI, we analyzed the virulence of  
231 *flg* RIR mutants in a hamster model of infection, which is particularly sensitive to TcdA and  
232 TcdB and manifests acute CDI.<sup>19, 20, 44</sup> Prior work showed that inactivation of genes in the *flgB*  
233 operon, which resulted in reduced toxin production, also attenuated virulence in this model,<sup>32, 33</sup>  
234 so we anticipated that the hamster model would distinguish the virulence of phase-locked *flg* ON  
235 and *flg* OFF mutants. To conserve animals, we narrowed this study to the *flg*- $\Delta$ 3 mutants which  
236 contain the smallest mutation that prevents flagellum and toxin phase variation. Antibiotic-  
237 treated male and female Syrian golden hamsters were inoculated with 1000 spores of wild-type  
238 R20291, *flg*- $\Delta$ 3 ON, or *flg*- $\Delta$ 3 OFF. These strains had no differences in growth (Figure S1),  
239 germination (Figure S2), or sporulation (Figure S3) *in vitro*. The animals were monitored for  
240 disease symptoms, including diarrhea and weight loss, and were euthanized if they exhibited  
241 hallmarks of disease as detailed in Materials and Methods. Initially, hamsters infected with the  
242 *flg*- $\Delta$ 3 ON or *flg*- $\Delta$ 3 OFF mutants appeared to become acutely symptomatic sooner than those  
243 infected with wildtype, however, there were no significant differences in time to euthanasia for  
244 animals infected with any of the strains (Figure 3A).

245 To determine bacterial burden, cecal contents collected immediately after euthanasia  
246 were serially diluted and plated on taurocholate cycloserine cefoxitin fructose agar (TCCFA) to  
247 enumerate *C. difficile* colony forming units (CFU). All animals that succumbed to disease had *C.*  
248 *difficile* detectable in their cecal contents ( $10^4$  CFU/g to  $10^7$  CFU/g). Wild-type R20291 was

249 present in 5.3-fold greater CFU compared to the *flg*- $\Delta$ 3 ON mutant ( $p < 0.01$ ); there were no  
250 significant differences among the other strains (Figure 3B). In the distal colons there was a  
251 similar trend, with 5-fold more CFU/g for the *flg*- $\Delta$ 3 OFF mutant compared to the *flg*- $\Delta$ 3 ON  
252 mutant ( $p = 0.06$ ) (Figure 3C). These results suggest that flagellar phase-locked ON mutants are  
253 less fit than the phase-locked OFF mutants in the hamster intestinal tract, though the effect was  
254 modest.

255 Because of the link between production of flagella and toxins *in vitro*, we analyzed toxin  
256 titers in cecal contents of hamsters that succumbed to disease using the Vero cell rounding  
257 assay.<sup>45</sup> All samples from infected animals caused detectable cell rounding, while no cell  
258 rounding occurred when treated with diluted cecal contents from mock-inoculated animals. The  
259 toxin titers for the *flg*- $\Delta$ 3 ON samples were 6.5-fold higher compared to the *flg*- $\Delta$ 3 OFF ( $p <$   
260  $0.01$ ) (Figure 3D). These results indicate that, despite the lack of difference in ability to cause  
261 acute CDI, preventing phase variation led to significant differences in toxin accumulation during  
262 infection, and flagellum and toxin gene expression are linked during infection as observed *in*  
263 *vitro*.

264

## 265 **Preventing flagellar switch inversion impacts colonization and disease dynamics of *C.***

### 266 ***difficile* in a mouse model**

267 While the hamster models acute CDI, the mouse typically develops less severe disease  
268 and serves as a model of *C. difficile* colonization. Antibiotic-treated male and female C57BL/6  
269 mice were inoculated with 10,000 spores of wild-type R20291, *flg*- $\Delta$ 3 ON, or *flg*- $\Delta$ 3 OFF.<sup>46</sup>  
270 Over the following 10 days, the mice were monitored for diarrhea and weight loss, and fecal  
271 samples were collected daily to assess bacterial burden and toxin levels. Bacterial burden in

272 feces achieved the highest levels between days 1 and 4 post-inoculation (p.i.) (Figures 4A, S4).  
273 Although all three strains were present in equivalent numbers during this time frame, the *flg-Δ3*  
274 ON elicited significantly greater weight loss than *flg-Δ3* OFF on days 1 through 3 (Figures 4C,  
275 S5). Wildtype resulted in intermediate weight loss, with significant differences from *flg-Δ3* ON  
276 and *flg-Δ3* OFF on days 2 and 3 p.i. (Figure 4D). The WT- and *flg-Δ3* ON-infected mice began  
277 recovering weight on day 3 p.i., with no significant differences in weight loss among the groups  
278 on day 4 and later. On day 4 p.i., the CFU/g feces from wildtype and *flg-Δ3* OFF infected mice  
279 began to decline, often to below the limit of detection, while *flg-Δ3* ON showed a comparatively  
280 modest decline between days 3 and 4 and then was maintained at  $\sim 10^5$  CFU/g feces in all mice  
281 through the duration of the experiment (Figures 4A, 4B, S4).<sup>41</sup> The *flg-Δ3* ON mutant was  
282 present in significantly higher numbers than wildtype on days 6 through 10 p.i. (Figures 4A, S4).  
283 The *flg-Δ3* OFF mutant colonized to levels similar to wildtype or intermediate between wildtype  
284 and *flg-Δ3* ON.

285 We additionally ensured that *flg-Δ3* ON and *flg-Δ3* OFF remained phase-locked by  
286 evaluating them at the infection endpoint. OS-qPCR analysis of genomic DNA purified from  
287 fecal samples indicated that the flagellar switch remained locked in *flg-Δ3* ON (collected on day  
288 9 p.i.; data not shown). The lower colonization levels by *flg-Δ3* OFF after day 5 precluded OS-  
289 qPCR analysis. As an alternative approach, *flg-Δ3* OFF bacteria from day 9 fecal samples were  
290 cultured on TCCFA, then *C. difficile* growth was pooled and tested for swimming motility. No  
291 motility was observed, suggesting that the flagellar switch remained in the OFF orientation and  
292 that no motile suppressor mutants arose during infection (data not shown). Together these results  
293 indicate that preventing flagellar switch inversion impacts *C. difficile* colonization and disease

294 symptom development, with the locked-ON state resulting in greater disease (weight loss) and  
295 maintenance of colonization.

296

297 **Differences in weight loss is attributable to a higher accumulation of toxins in *flg-Δ3* ON**  
298 **infected mice**

299 Differences in weight loss between mice infected with the *flg-Δ3* ON compared to  
300 wildtype and *flg-Δ3* OFF are consistent with the differences in toxin production by these strains.  
301 However, the weight recovery observed in mice infected with *flg-Δ3* ON indicated that this strain  
302 may have decreased toxin production through a SigD-independent mechanism. To evaluate this  
303 possibility, we determined the toxin titers in fecal samples collected over the 10-day experiments  
304 using a Vero cell rounding assay (44). All samples from infected animals caused detectable cell  
305 rounding, while no cell rounding occurred when treated with samples from mock-inoculated  
306 animals. On day 2, when the differences in weight loss between groups are greatest, the toxin  
307 titers in feces collected from *flg-Δ3* ON-infected mice were significantly higher than from mice  
308 infected with wildtype ( $p = 0.0041$ ); toxin titers were also higher than in feces from *flg-Δ3* OFF-  
309 infected mice, though the differences did not reach statistical significance (Figure 4E). No  
310 significant differences in toxin titers between groups of animals were observed for days 4 and 6.  
311 On day 8, the *flg-Δ3* ON samples again had toxin titers higher compared to the wildtype samples  
312 ( $p < 0.05$ ) (Figure 4E). These results suggest that the differences in weight loss observed on day  
313 2 p.i., when bacterial burden was equivalent across groups of infected animals (Figure 4C), is  
314 attributable at least in part to a higher accumulation of toxins in mice infected with *flg-Δ3* ON.  
315 However, the higher toxin levels in *flg-Δ3* ON-infected mice at later stages are likely due to the  
316 higher bacterial burden for this strain.

317

## 318 **Discussion**

319         In this study, we used precisely engineered mutations to the right inverted repeat to  
320 restrict flagellar switch inversion in *C. difficile* R20291, which allowed us to determine the role  
321 of flagellum and toxin phase variation in *C. difficile* physiology *in vitro* and during infection in  
322 two rodent models. We characterized mutants with varying abilities to undergo flagellar switch  
323 inversion and therefore flagellum and toxin phase variation. *In vitro*, these mutants were either  
324 attenuated or fully genotypically and phenotypically locked for swimming motility and toxin  
325 biosynthesis but were indistinguishable from wild-type bacteria in growth, sporulation, and  
326 germination rates. We analyzed phase-locked mutants in hamster and mouse models of *C.*  
327 *difficile* infection, with distinct outcomes. In hamsters, while the phase-locked mutants led to  
328 accumulation of significantly different levels of toxins in the cecum, these differences did not  
329 impact acute disease development. In contrast, in the mouse model the mutant with the flagellar  
330 switch locked in the ON state caused greater weight loss and persisted longer than wildtype and  
331 the locked OFF mutant, which is attributable to higher toxin levels produced by the locked-ON  
332 strain *in vivo*. These findings indicate that the ability to undergo flagellar switch inversion  
333 impacts *C. difficile* colonization and disease development.

334         Previous studies showed that the site specific recombinase RecV is required for inversion  
335 of the *flg*, *cwpV*, *cmrRST*, and CDR20291\_0963 switches, and over-expression of *recV*  
336 influences the inversion of the CDR20291\_0685 and CDR20291\_1514 switches.<sup>24, 42</sup>  
337 Interestingly, the inverted repeats for a given invertible sequence vary in length and in position  
338 relative to the determined site of DNA recombination.<sup>24</sup> Further, sequence conservation among  
339 the inverted repeats of RecV-invertible sequences is modest, making the identification of a core

340 RecV-binding sequence difficult. We found that substitution of three residues that are conserved  
341 among most of the RIRs (*flg-3sub*) reduced flagellar switch inversion from ON to OFF and OFF  
342 to ON but did not eliminate inversion. However, deleting the residue previously determined to be  
343 the site of flagellar switch inversion in the RIR and the two flanking residues (*flg-Δ3*), prevented  
344 inversion as effectively as deleting the RIR. These results validate the approach of identifying  
345 the recombination site by evaluating enrichment of 5' end clipped reads generated by whole  
346 genome sequencing.<sup>24</sup> Future work will determine whether changes to the site of recombination  
347 impair RecV binding and/or the ability to catalyze DNA inversion.

348         The *C. difficile flg* RIR mutants served to assess the role of flagellar switch inversion on  
349 phase variation *in vitro* and *in vivo*. The *flg-Δ3* and *flg-ΔRIR* mutations resulted in genetically  
350 and phenotypically locked strains. The respective ON mutants were motile while the OFF  
351 mutants remained non-motile. Consistent with the previously characterized link between  
352 flagellum and toxin gene expression via SigD, the ON mutants produced significantly more  
353 toxins *in vitro* than the OFF mutants, which produced toxins at a level comparable to the *sigD*  
354 control. In contrast to these RIR mutations, the *flg-3sub* mutation appeared to reduce but not  
355 eliminate flagellar switch inversion – the inversion assay using *E. coli* showed inversion levels  
356 intermediate between the WT and the *flg-Δ3/flg-ΔRIR* sequences. In a soft agar swimming  
357 motility assay, the *flg-3sub* OFF mutant exhibited motility, possibly because this assay imposes a  
358 strong selective pressure for bacteria that can swim to access nutrients;<sup>41</sup> the *flg-3sub* OFF  
359 bacteria that phase varied to *flg* ON would possess an advantage and lead to the observed motile  
360 phenotype. Consistent with the swimming motility medium imposing a selective pressure, motile  
361 suppressor mutants appeared in some experiments testing the swimming motility of the *flg-ΔRIR*  
362 and *flg-Δ3* OFF mutants, as we observed previously for the *recV flg* OFF mutant.<sup>41</sup> Unlike in the



363 motility assays, no difference in toxin level was apparent between the *flg*-3sub OFF and the *flg*-  
364  $\Delta$ RIR and *flg*- $\Delta$ 3 OFF mutants, likely because the growth conditions for the toxin experiments  
365 did not present a selective pressure for the *flg* ON variants.

366         Prior work by Aubry et al. using the hamster model of acute CDI showed that mutation of  
367 genes in the *flgB* operon in *C. difficile* 630 $\Delta$ *erm* resulted in reduced toxin gene expression,  
368 reduced toxin production, and attenuated virulence in hamsters.<sup>32</sup> Our results showing no  
369 discernable difference in CDI development in hamsters between R20291 phase-locked ON and  
370 OFF mutants were therefore unexpected. The discrepancy in results may be attributable to strain  
371 background. We used 027 ribotype *C. difficile* R20291, which expresses toxin genes and  
372 produces toxins at higher levels than the 630 lineage.<sup>36, 47</sup> There are known differences in the  
373 flagellar loci in 630 and R20291 strains,<sup>36</sup> and we previously showed that *C. difficile* 630 is not  
374 capable of flagellum and toxin phase variation.<sup>25</sup> In addition, mutation of flagellar genes had  
375 different effects in R20291 and 630 $\Delta$ *erm*, a derivative of 630.<sup>32, 33, 48</sup> We suspect that, despite  
376 exhibiting ~6-fold reduced toxin accumulation compared to the other strains, *flg*- $\Delta$ 3 OFF  
377 nonetheless secreted sufficient toxin to cause acute disease in hamsters given their high  
378 sensitivity to *C. difficile* toxins.

379         Flagella have been shown to play a contributing role in R20291 colonization of the  
380 mouse intestinal tract. Non-motile R20291 *fliC* (flagellin), *fliD* (flagellar cap), or *flgE* (hook  
381 protein) mutants showed reduced adherence to Caco-2 intestinal epithelial cells *in vitro*, and in a  
382 co-infection with wild-type R20291, the *fliC* mutant colonized mice in fewer numbers.<sup>33</sup> In the  
383 current study, the mouse model was more effective at revealing differences between *flg*- $\Delta$ 3 ON  
384 and *flg*- $\Delta$ 3 OFF. During peak colonization on days 1-3 p.i., *flg*- $\Delta$ 3 ON resulted in the greatest  
385 weight loss, consistent with higher toxin production by this mutant *in vitro*; *flg*- $\Delta$ 3 OFF did not

386 elicit weight loss in mice, despite being present in equivalent numbers at these time points and  
387 producing toxin levels similar to wildtype. During later stages of infection, most mice began  
388 recovering weight between days 3 and 4 p.i., when bacterial loads begin to decline, and weights  
389 were indiscernible from mock-inoculated animals by day 6. Interestingly, mice infected with *flg-*  
390  $\Delta 3$  ON recovered their starting weight, even though their numbers were 2-logs higher than  
391 wildtype and *flg-* $\Delta 3$  OFF. One possible explanation for weight recovery in *flg-* $\Delta 3$  ON-infected  
392 mice is a SigD-independent (and therefore phase variation independent) down-regulation of  
393 toxin production. For example, another toxin gene regulator such as CcpA or CodY could limit  
394 toxin synthesis, and SigH, Spo0A, RstA, and SinR could also unlink flagellar and toxin gene  
395 expression.<sup>49-53</sup> However, mean toxin titers remained consistent in feces from *flg-* $\Delta 3$  ON-  
396 infected mice (compared to decreasing titers from wildtype and *flg-* $\Delta 3$  OFF-infected mice). The  
397 lack of weight loss in *flg-* $\Delta 3$  OFF-infected mice at early time points and in *flg-* $\Delta 3$  ON-infected  
398 mice at later stages could be due to altered localization of these phase-locked mutants in the  
399 intestinal tract, which we speculate results in inefficient delivery of toxins to the epithelium.  
400 Both flagellin and the toxins of *C. difficile* have marked immunostimulatory properties and  
401 exhibit cooperativity in eliciting an inflammatory response,<sup>18, 54-56</sup> which may alter the spatial  
402 and temporal dynamics of colonization for a strain with constitutively elevated (*flg-* $\Delta 3$  ON) or  
403 reduced (*flg-* $\Delta 3$  OFF) levels of these factors. It is also possible that the observed phenotypes are  
404 driven by other mechanisms. SigD, encoded in the *flgB* operon and regulated by the flagellar  
405 switch, also regulates genes involved in membrane transport, metabolism, regulation, and cell  
406 wall protein synthesis.<sup>39</sup> These factors may therefore be subject to phase variation and influence  
407 *C. difficile* colonization and pathogenesis.

408           Beyond the population-level analyses of the current study, future work investigating the  
409 spatial and temporal dynamics of colonization by individual *flg* ON and *flg* OFF cells, both  
410 phase-locked and those arising in a wild-type background, may help clarify the effects of  
411 flagellum and toxin phase variation on *C. difficile* colonization and disease development. Does  
412 one variant population appear in a particular region of the intestine, either longitudinally or with  
413 respect to the epithelium? Does one variant associate with sites of inflammation? Such studies  
414 may reveal host and microbiota-derived factors that influence the fitness and virulence of *C.*  
415 *difficile*. Further, because these variants exhibiting different disease potential arise naturally and  
416 switch stochastically, flagellum and toxin phase variation may influence not only disease  
417 severity but also recurrence. This work may therefore help to identify the *C. difficile*  
418 determinants of infection versus asymptomatic carriage which may in turn lead to strategies to  
419 distinguish between these potential outcomes, better predict disease severity and recurrence, and  
420 mitigate transmission.<sup>57</sup>

421

## 422 **Materials and Methods**

### 423 ***Growth and maintenance of bacterial strains***

424           Strains and plasmids used in this study are listed in Table S1. *C. difficile* strains were  
425 grown in an anaerobic chamber (Coy Laboratories) using a gas mix consisting of 85% N<sub>2</sub>, 5%  
426 CO<sub>2</sub>, and 10% H<sub>2</sub>. *C. difficile* was routinely cultured in Brain Heart Infusion medium (Becton  
427 Dickinson) supplemented with 5% yeast extract (Becton Dickinson) (BHIS) or in Tryptone Yeast  
428 (TY) broth as indicated. All *C. difficile* broth cultures were grown at 37°C statically, with 10  
429 µg/mL thiamphenicol (Tm<sub>10</sub>) for plasmid maintenance as needed. *E. coli* DH5a and  
430 HB101(pRK24) were cultured under aerobic conditions in LB broth, Miller (Fisher) at 37°C. In

431 *E. coli*, plasmids were maintained with 100 µg/mL ampicillin (Amp<sub>100</sub>), 10 µg/mL  
432 chloramphenicol (Cm<sub>10</sub>), and/or 100 µg/mL kanamycin (Kan<sub>100</sub>), as indicated.

433

#### 434 ***Orientation-specific PCR***

435 *E. coli* strains used in this study are listed in Table S1. Strains used for orientation-  
436 specific PCR contain two plasmids: one for expression of *recV* and the other containing the  
437 target flagellar switch sequence.<sup>22, 23</sup> Bacteria were subcultured in BHIS-Cm<sub>10</sub>-Kan<sub>100</sub> overnight  
438 at 37°C and diluted 1:50 into fresh medium. When cultures reached an OD<sub>600</sub> 0.3-0.4 (early  
439 exponential phase), 200 ng/ml anhydrotetracycline (ATc) was added to induce *recV* expression.  
440 Cultures were grown until OD<sub>600</sub> 1.0, and plasmids were purified using the GeneJET Plasmid  
441 Miniprep Kit (Thermo Fisher). Purified plasmids were used as template for PCR using primers  
442 that discriminate between each flagellar switch sequence orientation. Primers R1614 and R857  
443 were used to amplify the ON orientation of the flagellar switch, which corresponds to the  
444 published sequence of R20291 (FN545816.1). Primers R1615 and R857 were used to amplify  
445 the OFF orientation of the flagellar switch. All primer sequences are listed in Table S2.

446

#### 447 ***Generation of mutant strains***

448 To facilitate the generation of mutations in the *flgB* UTR in *C. difficile* R20291, we first  
449 deleted the UTR then restored the region with mutant versions of the sequence by allelic  
450 exchange with pMSR0, an *E. coli*-*C. difficile* shuttle vector for toxin-mediated allele exchange  
451 mutagenesis.<sup>58</sup> To delete the *flgB* UTR (*flgB*ΔUTR), upstream and downstream homology  
452 regions were amplified from R20291 genomic DNA with R2459 and R2448 or R2449 and  
453 R2450, respectively. Gibson assembly was used to introduce these fragments into BamHI-

454 digested pMSR0. Clones were confirmed by PCR and sequencing with plasmid-specific primers  
455 R2743 and R2744, which flank the cloning site. The resulting plasmid pRT2546 was introduced  
456 into heat-shocked *C. difficile* R20291 via conjugation with *E. coli* HB101(pRK24).<sup>59</sup> The  
457 procedure for allelic exchange was performed as described previously,<sup>58</sup> except transconjugants  
458 were selected and passaged on BHIS-Tm<sub>10</sub>-Kan<sub>100</sub> agar. Individual colonies were streaked on  
459 BHIS-Tm<sub>10</sub>-Kan<sub>100</sub> agar to ensure purity, then streaked on BHIS-agar with 100 ng/ml ATc  
460 (ATc<sub>100</sub>) to induce expression of the toxin-antitoxin genes and eliminate bacteria that still contain  
461 pMSR0. Colonies were screened for the desired deletion by PCR with R2451 and R2452.  
462 Genomic DNA was isolated from presumptive mutants, amplified with R2451 and R2452, and  
463 the resulting PCR product was sequenced with R1512 and R2672 to confirm integrity of the  
464 sequence.

465         Six different inverted repeat mutant constructs were created in *C. difficile* *flgB*ΔUTR. For  
466 all three *flg* ON constructs, RT1702 (*recV flg* ON) genomic DNA was used as the template, and  
467 RT1693 (*recV flg* OFF) was used as the template for all three *flg* OFF constructs. Mutants with 3  
468 nucleotide substitutions (*flg*-3sub) were created by changing nucleotides 440-442 of the 498 nt  
469 *flgB* UTR from CAA to GTT (Figure 3.2). Mutants with deletions of the right inverted repeat  
470 (*flg*-ΔRIR) had nucleotides 424-442 of the *flgB* UTR deleted. A 3 bp deletion (*flg*-Δ3) was made  
471 by deleting nucleotides 424-426 of the *flgB* UTR. Overlapping PCR fragments with the desired  
472 mutation were amplified and introduced into BamHI/XhoI-digested pMSR0 by Gibson  
473 assembly. The following primer pairs were used to amplify the respective fragments (designated  
474 as upstream, downstream): *flg*-3sub OFF – R2896 and R2883, R2882 and R2843; *flg*-ΔRIR OFF  
475 – R2896 and R2870, R2869 and R2843; *flg*-Δ3 OFF – R2896 and R2885, R2884 and R2843; *flg*-  
476 3sub ON – R2896 and R2889, R2888 and R2843; *flg*-ΔRIR ON – R2896 and R2887, R2886 and

477 R2843; *flg*- $\Delta$ 3 ON – R2896 and R2891, R2890 and R2843. The presence of inserts in pMSR0  
478 was confirmed by PCR with R2743 and R2744, and desired mutations were confirmed by  
479 sequencing with R1611, R2313 and R2314. The resulting pMSR0 derivatives were introduced  
480 into the *flgB* $\Delta$ UTR mutant by conjugation with *E. coli* HB101(pRK24). After selection on BHIS-  
481 ATc<sub>100</sub> plates, colonies were screened with R1512 and R1611 for integration of *flg* constructs.  
482 Genomic DNA was isolated from presumptive mutants, amplified with R2451 and R2452, and  
483 the resulting PCR product was sequenced with R1512 to confirm integrity of the sequence. The  
484 *flg*- $\Delta$ 3 mutants used in the infection studies and parental R20291 strain were subjected to whole  
485 genome sequencing (Microbial Genome Sequencing Center, Pittsburg, PA) to confirm that no  
486 unintended sequence polymorphisms arose.

487 To generate inverted repeat mutants in *E. coli*, the mutant constructs were amplified from  
488 the respective pMSR0 plasmids (OFF – *flg*-3sub, *flg*- $\Delta$ RIR, *flg*- $\Delta$ 3; ON – *flg*-3sub, *flg*- $\Delta$ RIR, *flg*-  
489  $\Delta$ 3) using R1512 and R1611. These constructs were digested with SphI/EcoRI and ligated into  
490 similarly digested pMC123. The presence and integrity of insert was confirmed by PCR with  
491 R2313 and R2314 and by sequencing with R2313 and R2462 for *flg* ON and R313 and R2463  
492 for *flg* OFF versions. For inversion assays in *E. coli*, these constructs were co-transformed with  
493 pMWO-074::*recV* (ATc-inducible P<sub>tet</sub> promoter) into DH5 $\alpha$ .

494 For overexpression of *recV* in *flg* ON inverted mutant strains, pRT1611 (vector control)  
495 or pRT1611::*recV* were introduced by conjugation with *E. coli* HB101(pRK24) and confirmed  
496 by PCR.

497

498 ***Quantitative PCR analysis of the flagellar switch orientation in C. difficile***

499 *C. difficile* strains were grown in BHIS medium to an OD<sub>600</sub> ~1.0, and genomic DNA was  
500 extracted as previously described.<sup>60</sup> To analyze flagellar switch orientation from *C. difficile* in  
501 mouse feces, fecal samples were suspended in DPBS, treated with lysozyme, and subjected to  
502 bead beating to lyse cells including spores. Genomic DNA was purified by phenol/chloroform  
503 extraction and washed with ethanol. Quantitative PCR was done using 10 ng (broth culture) or  
504 100 ng (fecal samples) of genomic DNA as template with SYBR Green Real-Time qPCR  
505 reagents (Bioline), primers at a final concentration of 1 μM, and an annealing temperature of  
506 55°C. Primers R2175 and R2177 were used to detect the ON orientation and primers R2176 and  
507 R2177 were used to detect the OFF orientation. Quantification was done as described previously  
508 using the *rpoC* as the control gene.<sup>24</sup>

509

#### 510 ***Swimming motility assay***

511 For assays using *in vitro* cultures, a single colony from a freshly streaked BHIS plate was  
512 inoculated into 0.5X BHIS-0.3% agar to assay flagellum-dependent swimming motility as  
513 previously described.<sup>37</sup> The diameter of motile growth was measured after 48 hours incubation at  
514 37°C. Plates were imaged using the G:BOX Chemi imaging system with the Upper White Light  
515 illuminator. To assess swimming motility of *C. difficile* present in mouse feces, diluted fecal  
516 samples from each were plated on TCCFA to enrich for *C. difficile*, and growth was pooled and  
517 tested for swimming motility in 0.5X BHIS-0.3% agar.

518

#### 519 ***Detection of TcdA by immunoblot***

520 Immunoblot for TcdA production was performed as previously described.<sup>23, 41, 61</sup> Cultures  
521 were grown overnight (~16 hours) in TY broth, normalized to an OD<sub>600</sub> 1.0, and collected by

522 centrifugation at 16,000 x g for 5 minutes. Pellets were suspended in 2x SDS-PAGE sample  
523 buffer and boiled for 10 minutes. Samples were electrophoresed on 4%–15% Mini-PROTEAN  
524 TGX Precast Protein Gels (Bio-Rad) and transferred to a nitrocellulose membrane (Bio-Rad).  
525 Membranes were stained with Ponceau S (Sigma) to assess sample loading and imaged using the  
526 G:Box Chemi imaging system. TcdA was detected using mouse  $\alpha$ -TcdA antibody (Novus  
527 Biologicals) followed by goat anti-mouse IgG secondary antibody conjugated to DyLight 800 4x  
528 PEG (Invitrogen). Blots were imaged using the Odyssey imaging system (LI-COR).

529

### 530 ***Vero cell rounding assay***

531 We used a previously described protocol to quantify *C. difficile* toxin activity in hamster  
532 cecal contents, mouse feces, and bacteria grown overnight in TY broth.<sup>45</sup> For the assay,  $5 \times 10^4$   
533 Vero cells in 90  $\mu$ l were seeded in each well of a tissue-culture treated, flat bottom 96-well plate  
534 (Corning) and allowed to incubate overnight (~24 hours). The following day, cecal contents  
535 collected during necropsy (hamsters) or fecal samples (mice) were thawed at room temperature,  
536 weighed, and suspended in 1x DPBS to make an initial 1:10 dilution stock. *In vitro* cultures were  
537 grown overnight (~16 hours) in TY broth, OD<sub>600</sub> was measured, and cells were pelleted by  
538 centrifugation at 16,000 x g for 5 minutes. Supernatants of cecal contents, fecal samples, and  
539 broth cultures were sterilized by passing through a 0.45  $\mu$ m filter. Serial dilutions in 1x DPBS  
540 were performed on ice, and 10  $\mu$ l were applied to each well with Vero cells. DPBS was used as a  
541 control. The cells were incubated overnight (~18 hours) in a tissue culture incubator at 37°C and  
542 an atmosphere with 5% CO<sub>2</sub>, and cell rounding was assessed using a 10x objective on a light  
543 microscope. Toxin titer was calculated as the reciprocal of the highest dilution causing  $\geq 80\%$  cell  
544 rounding, normalized to OD<sub>600</sub> of the starting culture (*in vitro*), the amount of cecal contents, or



545 the amount of fecal material (*in vivo*). Samples collected from mock-infected animals were also  
546 assayed to show that rounding was specific to *C. difficile*-infected animals.

547

#### 548 ***Spore purification***

549 Overnight cultures (100  $\mu$ L) were spread on three to five 70:30 agar plates.<sup>62</sup> After 72  
550 hours of growth at 37°C, bacterial growth was collected, suspended in 10 mL DPBS and stored  
551 aerobically at room temperature overnight. Spores were purified by washing the suspension four  
552 times with DPBS before purification using a sucrose gradient as described.<sup>63</sup> After discarding  
553 supernatant that contains cell debris, the spore pellet was washed five more times with DPBS +  
554 1% BSA. Spores were stored in DPBS + 1% BSA at room temperature until use.

555

#### 556 ***Sporulation assay***

557 Sporulation was assayed as described previously.<sup>64</sup> Briefly, *C. difficile* strains were  
558 grown overnight in BHIS medium supplemented with 0.1% TA and 0.2% fructose to prevent  
559 spore accumulation. Cultures were diluted 1:30 in BHIS-0.1% TA-0.2% fructose and upon  
560 reaching OD<sub>600</sub> 0.5, 250  $\mu$ l of culture was applied to 70:30 agar<sup>62</sup>. An ethanol resistance  
561 sporulation assay was performed at this point to confirm the absence of spores at the initiation of  
562 the assay. After 24 hours of growth at 37°C, cells were suspended in BHIS to an OD<sub>600</sub> 1.0, and  
563 an ethanol resistance assay was performed. To eliminate all vegetative cells, 0.5 mL of culture  
564 was mixed with 0.5 mL of 57% ethanol to achieve a final concentration of 28.5% ethanol,  
565 vortexed and incubated for 15 minutes. To enumerate spores, serial dilutions were made in PBS-  
566 0.1% TA and plated on BHIS-0.1% TA agar. To enumerate vegetative cells, serial dilutions of

567 the BHIS cell suspension were plated on BHIS agar. Sporulation efficiency was calculated as the  
568 total number of spores divided by the total number of viable cells (spores plus vegetative).

569

### 570 ***Germination assay***

571 Spore germination was analyzed at room temperature (27°C) by measuring the change in  
572 OD<sub>600</sub> as previously described.<sup>65</sup> The germination assay was performed in clear 96-well flat  
573 bottom plates (Corning) in a final reaction volume of 100 µl in buffer with 30 mM glycine, 50  
574 mM Tris, 100 mM NaCl, pH 7.5. Spores were suspended in assay buffer, heated at 65°C for 30  
575 minutes, placed on ice for 1 minute and added to wells to a final OD<sub>600</sub> 0.7. At the start of the  
576 assay, 10 mM sodium taurocholate (Sigma Aldrich) (TA) was added to induce germination; no-  
577 taurocholate controls were done in parallel. Optical density was measured every 2 minutes for 1  
578 hour using a BioTek Synergy plate reader.

579

### 580 ***Ethics statement***

581 Mouse and hamster experiments were performed under the guidance of veterinary staff  
582 within the University of North Carolina Chapel Hill Division of Comparative Medicine (DCM).  
583 All animal studies were done with prior approval from UNC-CH Institutional Animal Care and  
584 Use Committee. Animals that were considered moribund were euthanized by CO<sub>2</sub> asphyxiation  
585 and thoracotomy in accordance with the Panel on Euthanasia of the American Veterinary  
586 Medical Association.

587

### 588 ***Animal Experiments***

589 Hamster Experiments: Male and female six- to ten-week-old Syrian golden hamsters  
590 (Charles River Laboratories) were housed individually and given a standard rodent diet and  
591 water *ab libitum*. To induce susceptibility to *C. difficile* infection, one dose of clindamycin (30  
592 mg/kg of body weight) was administered by oral gavage 5 days prior to inoculation. Hamsters  
593 were inoculated by oral gavage with approximately 1,000 spores of a single strain of *C. difficile*.  
594 Mock inoculated animals were included in each experiment. Fecal samples were collected daily  
595 to examine bacterial burden. The animals were monitored at least daily for disease symptoms  
596 including weight loss, diarrhea, wet tail, and lethargy. Hamsters that lost 15% or more of their  
597 weight or showed severe signs of disease were euthanized by CO<sub>2</sub> asphyxiation and  
598 thoracotomy. Immediately following euthanasia, a necropsy was performed, and cecal contents  
599 (not cecal tissue) were collected for enumeration of bacterial CFU, genomic DNA isolation for  
600 PCR, and toxin quantification. To enumerate CFU from fecal and cecal contents, samples were  
601 weighed, suspended in 1 mL DPBS, heated at 55°C for 20 minutes, and dilutions plated on  
602 TCCFA.<sup>66, 67</sup> To enumerate CFU from the distal colon, the last 3 cm of the colon were excised  
603 during necropsy. The samples were weighed, suspended in DPBS, processed with a tissue  
604 homogenizer, heated, and plated similarly to cecal and fecal samples. *C. difficile* CFU were  
605 enumerated after 48 hours of incubation. Twelve animals (6 male, 6 female) per *C. difficile* strain  
606 were tested in two independent experiments. Log rank test for trend was used for statistical  
607 analysis of survival data.

608 Mouse experiments: Groups of male and female C57BL/6 mice (Charles River  
609 Laboratories) aged 8- to 10-weeks were subjected to a previously described antibiotic regimen to  
610 render them susceptible to *C. difficile* infection.<sup>46, 68</sup> Mice were given a cocktail of kanamycin  
611 (400 µg/ml), gentamicin (35 µg/ml), colistin (850 units/ml), vancomycin (45 µg/ml), and

612 metronidazole (215 µg/ml) in their water *ad libitum* seven days prior to inoculation for three  
613 days, then returned to regular water for the duration of the experiments. A single intra-peritoneal  
614 dose of clindamycin (10 mg/kg body weight) was administered 2 days prior to inoculation. Mice  
615 were randomly assigned into groups, with two mice assigned to the mock condition and six mice  
616 (3 male, 3 female) to each infection condition. The experiment was independently repeated, and  
617 the data were combined for a total of 12 mice (6 male, 6 female) in each infection condition.  
618 Mice were inoculated with 10<sup>5</sup> spores by oral gavage. Mock-inoculated animals were included as  
619 controls. Cage changes were performed every 48 h post-inoculation.<sup>68, 69</sup> Animal weights were  
620 recorded, and fecal samples were collected every 24 h for seven days post-inoculation. Fecal  
621 samples were homogenized, and dilutions were plated on TCCFA plates, which contain 0.1% of  
622 the germinant taurocholate to enumerate spores as colony forming units (CFU) per gram of  
623 feces. Additional fecal samples were collected for OS-qPCR analysis to determine flagellar  
624 switch orientation and for Vero cell rounding assays to quantify toxins.

625

## 626 **Statistical Analysis and Data Availability**

627 All experiments reflect at least three independent biological replicates, except for animal  
628 experiment, which were done twice. Statistical analysis was done using GraphPad Prism 9.1.0.  
629 Upon publication, the data that support the findings of this study are available from the  
630 corresponding author, R.T., upon reasonable request.

631

## 632 **Acknowledgements**

633 The authors declare no competing interests for this study. This work was supported by NIH  
634 award R01-AI107029 and R01-AI143638 to R.T. CLW is supported by an Institutional Research

635 and Academic Career Development Awards (IRACDA) fellowship under K12-GM000678. The  
636 funding agency had no role in the design or execution of this study, the analysis of the data, or  
637 the decision to publish the results.

## 638 **Figure Captions**

639 **Figure 1. Mutations in *flg* RIR affect inversion in *E. coli* and *C. difficile*.** A. Alignment of  
640 inverted repeats flanking the invertible DNA sequences affected by RecV. Shading denotes  
641 residues conserved in at least 4 of the 6 repeats. Putative inverted repeats are underlined.  
642 Hyphens between LIRs and RIRs represent the intervening sequences, which vary in length and  
643 nucleotide sequence. For the *flgB*-RIR, the site of cleavage by RecV is indicated with an asterisk.  
644 This nucleotide and the two adjacent residues, indicated in red, were deleted in *flg*- $\Delta$ 3  
645 constructs/strains. Note that the adenine 5' of the cleavage site is present in the *flg* ON sequence,  
646 whereas a thymine is present in *flg* OFF; constructs for mutagenesis were created in both *flg*  
647 orientations. The conserved CAA nucleotides mutated in *flg*-3sub constructs/strains are boxed in  
648 black. Nucleotides deleted in *flg*- $\Delta$ RIR bacteria/constructs are indicated. LIR, RIR = left, right  
649 inverted repeats. Numbers indicate locus tags in *C. difficile* R20291. B, C. Orientation-specific  
650 PCR to examine flagellar switch inversion in *E. coli* bearing wild-type or mutated inverted repeat  
651 target sequences. The starting orientation of the flagellar switch is indicated: *flg* ON (B) or *flg*  
652 OFF (C). Absence or presence of ATc for induction of *recV* expression is shown (-ATc/+ATc).  
653 The *flg* ON and *flg* OFF products are indicated with white and black arrows, respectively. Shown  
654 are representative images of three independent experiments. (D) Analysis of flagellar switch  
655 orientation in *C. difficile* RIR mutants by quantitative orientation-specific PCR. Means and  
656 standard deviations for three biological replicates are shown.

657 **Figure 2. Mutations in *flg* RIR affect *C. difficile* motility and toxin production.** (A)  
658 Representative image of swimming motility in soft agar medium of *C. difficile* R20291 (WT),  
659 *flg*-3sub ON and OFF, *flg*- $\Delta$ RIR ON and OFF, and *flg*- $\Delta$ 3 ON and OFF, and *sigD*-null non-  
660 motile control, incubated for 48 hours. (B) Quantification of swimming motility after 48 h of

661 strains in (A). (C) Immunoblot detection of TcdA and toxin titers after growth in TY broth. For  
662 immunoblot, a representative image of three independent experiments is shown. Toxin titers of  
663 supernatants from overnight bacterial cultures were calculated as the reciprocal of the highest  
664 dilution that causes  $\geq 80\%$  rounding of Vero cells, expressed after log-transformation and  
665 normalization to OD<sub>600</sub> of the cultures. (B, C) Each symbol represents one biological replicate,  
666 and dotted line represents the limit of detection.  $*p < 0.05$  by one-way ANOVA with Dunnett's  
667 post-test comparing values to *flg*- $\Delta 3$  ON. (D) Quantitative orientation-specific PCR of the  
668 flagellar switch in WT, *flg*-3sub ON, *flg*- $\Delta$ RIR ON, and *flg*- $\Delta 3$  ON mutants expressing *recV*  
669 (pRecV) or bearing vector. Means and standard deviations are shown.  $****p < 0.0001$ ,  
670  $***p < 0.001$ ,  $**p < 0.01$  by one-way ANOVA and Dunnett's post-test comparing values to WT  
671 pRecV. P value for comparison of WT pRecV and *flg*-3sub ON pRecV was determined by  
672 unpaired two-tailed t-test. (B-D) Means and standard deviations are shown.

673 **Figure 3. Interfering with flagellar switch inversion affects toxin accumulation and**  
674 **bacterial burden in a hamster model of CDI.** Antibiotic-treated male and female Syrian  
675 Golden hamsters were inoculated with 1000 spores of wild-type R20291 (WT), *flg*- $\Delta 3$  ON, and  
676 *flg*- $\Delta 3$  OFF. Mock-inoculated animals were included in each experiment. Data are combined  
677 from two independent experiments testing strains in 3 male and 3 female hamsters, for 12 total  
678 hamsters per strain. (A) Kaplan-Meier analysis of survival. (B) CFU in cecal contents.  $**p < 0.01$   
679 by Kruskal-Wallis test with Dunn's post-test. (C) CFU from homogenized distal colon from six  
680 animals of one experiment. P value was determined by Mann-Whitney test. (D) Toxin titers in  
681 cecal contents calculated as the reciprocal of the highest dilution to cause  $\geq 80\%$  rounding of  
682 Vero cells. No cell rounding occurred when treated with diluted cecal contents from mock-  
683 inoculated animals. Bars indicate the means; dotted line represents the limit of detection.

684 \*\* $p < 0.01$  with Kruskal-Wallis test with Dunn's post-test. (B, C, D) Symbols indicate CFU from  
685 individual animals and bars indicate medians.

686 **Figure 4. Locking the flagellar switch in the ON orientation exacerbates disease and**  
687 **increases persistence of *C. difficile* in a mouse model of CDI.** Antibiotic-treated male and  
688 female C57BL/6 mice were inoculated with 100,000 spores of wild-type R20291 (WT), *flg-Δ3*  
689 ON, and *flg-Δ3* OFF. Mock-inoculated animals were included in each experiment. Data are  
690 combined from two independent experiments testing strains in 3 male and 3 female mice, for 12  
691 total mice per strain. (A) CFU enumerated in fecal samples collected every 24 hours post-  
692 inoculation (p.i.). Asterisks indicate statistical comparison to WT data at that time point. (B)  
693 CFU per gram feces collected on day 6 p.i.; data for days 5 - 10 shown in Figure S4. Symbols in  
694 each group distinguish results from two independent experiments. (C) Animal weights  
695 determined every 24 hours post-inoculation, expressed as a percentage of the mouse's weight at  
696 day 0. Asterisks indicate statistical comparison to mock data at that time point. (D) Animal  
697 weights at Day 2 p.i.; data for days 1 - 6 shown in Figure S5. (E) Toxin titers in fecal samples  
698 calculated as the reciprocal of the highest dilution to cause  $\geq 80\%$  rounding of Vero cells. No cell  
699 rounding occurred when treated with diluted fecal contents from mock-inoculated animals. (A-E)  
700 Symbols indicate values from individual animals; dotted lines represent limit of detection. (A, B,  
701 E) Bars indicate the medians. Statistical significance was determined using the Kruskal-Wallis  
702 test and Dunn's post-test. (C, D) Bars indicate means and standard error. Statistical significance  
703 was determined by one-way ANOVA with Tukey's post-test. \* $p < 0.05$ , \*\* $p < 0.01$ , \*\*\* $p < 0.001$ ,  
704 \*\*\*\* $p < 0.0001$ .

705

706



707 **Supporting information**

708 **Table S1. Strains and plasmids used in this study.**

709 **Table S2. Oligonucleotides used in this study.**

710 **Figure S1. Mutations in *flg* RIR do not affect growth.** Growth curves of WT, *flg* ON and OFF

711 RIR (3sub,  $\Delta$ RIR,  $\Delta$ 3) mutants. Overnight cultures grown in TY medium were diluted 1:50 into

712 BHIS broth. Optical density (OD<sub>600</sub>) was measured every 30 minutes for 8 hours. Shown are the

713 means and standard deviation for 6 biological replicates.

714 **Figure S2. Mutations in *flg* RIR do not affect germination.** Purified spores of indicated strains

715 were germinated in the presence of taurocholate (+) or in buffer without germinant as a control (-

716 ), and optical density (OD<sub>600</sub>) was measured. Germination was plotted as the ratio of optical

717 density (OD<sub>600</sub>) at a given time point ( $t_x$ ) versus initial OD<sub>600</sub> ( $t_0$ ). A representative germination

718 plot of six independent experiments each consisting of 2 technical replicates is shown.

719 **Figure S3. Mutations in *flg* RIR do not affect sporulation.** Sporulation efficiency was

720 evaluated by ethanol resistance and calculated as the total number of spores divided by the total

721 number of viable cells (spores plus vegetative). A sporulation-deficient *spo0A* mutant was

722 included as a control. The means and standard deviation of three independent experiments are

723 shown. n.d. – not detectable.

724 **Figure S4. Bacterial load in feces collected from mice inoculated with WT, *flg*- $\Delta$ 3 ON, and**

725 ***flg*- $\Delta$ 3 OFF.** CFU enumerated in fecal samples collected every 24 hours p.i., with data in Figure

726 4A separated by day. Day 6 data are shown in Figure 4B. Two independent experiments with n =

727 6 (3 male, 3 female) were done and the data combined for n = 12. Bars indicate the medians, and

728 dotted lines represent the limit of detection. No CFU were detected in feces of mock-inoculated

729 mice. \*\* $p < 0.01$ , \*\*\* $p < 0.001$ , by Kruskal-Wallis test with Dunn's post-test comparing all strains.

730 **Figure S5. The *flg-Δ3* ON mutant elicits greater weight loss in mice.** Animal weights  
731 measured every 24 hours post-inoculation expressed as a percentage of the mouse's starting  
732 weight at day 0, with data from Figure 4C separated by day; day 2 data are shown in Figure 4D.  
733 Two independent experiments with n = 6 (3 male, 3 female) were done and the data combined  
734 for n = 12. Symbols represent values from individual animals, and bars indicate the means and  
735 standard error. \* $p < 0.05$ , \*\* $p < 0.01$ , \*\*\* $p < 0.001$  by one-way ANOVA with Tukey's post-test  
736 comparing all strains.

## 737 **References**

- 738
- 739 1. van der Woude MW, Baumberg AJ. Phase and antigenic variation in bacteria. *Clin*  
740 *Microbiol Rev.* 2004;17(3):581-611.
  - 741 2. Phillips ZN, Tram G, Seib KL, Attack JM. Phase-variable bacterial loci: how bacteria  
742 gamble to maximise fitness in changing environments. *Biochem Soc Trans.* Aug 30  
743 2019;47(4):1131-1141.
  - 744 3. Reyes Ruiz LM, Williams CL, Tamayo R. Enhancing bacterial survival through  
745 phenotypic heterogeneity. *PLoS Pathog.* May 2020;16(5):e1008439.
  - 746 4. Cotter PA, Miller JF. BvgAS-mediated signal transduction: analysis of phase-locked  
747 regulatory mutants of *Bordetella bronchiseptica* in a rabbit model. *Infect Immun.* Aug  
748 1994;62(8):3381-3390.
  - 749 5. Weiser JN, Austrian R, Sreenivasan PK, Masure HR. Phase variation in pneumococcal  
750 opacity: relationship between colonial morphology and nasopharyngeal colonization.  
751 *Infect Immun.* Jun 1994;62(6):2582-2589.
  - 752 6. Cundell DR, Weiser JN, Shen J, Young A, Tuomanen EI. Relationship between colonial  
753 morphology and adherence of *Streptococcus pneumoniae*. *Infect Immun.* Mar  
754 1995;63(3):757-761.
  - 755 7. Kim JO, Weiser JN. Association of intrastrain phase variation in quantity of capsular  
756 polysaccharide and teichoic acid with the virulence of *Streptococcus pneumoniae*. *J*  
757 *Infect Dis.* Feb 1998;177(2):368-377.
  - 758 8. Melvin JA, Scheller EV, Miller JF, Cotter PA. *Bordetella pertussis* pathogenesis: current  
759 and future challenges. *Nat Rev Microbiol.* Apr 2014;12(4):274-288.
  - 760 9. Tipton KA, Dimitrova D, Rather PN. Phase-Variable Control of Multiple Phenotypes in  
761 *Acinetobacter baumannii* Strain AB5075. *J Bacteriol.* Aug 1 2015;197(15):2593-2599.
  - 762 10. Chin CY, Tipton KA, Farokhyfar M, Burd EM, Weiss DS, Rather PN. A high-frequency  
763 phenotypic switch links bacterial virulence and environmental survival in *Acinetobacter*  
764 *baumannii*. *Nat Microbiol.* May 2018;3(5):563-569.
  - 765 11. Anderson SE, Chin CY, Weiss DS, Rather PN. Copy Number of an Integron-Encoded  
766 Antibiotic Resistance Locus Regulates a Virulence and Opacity Switch in *Acinetobacter*  
767 *baumannii* AB5075. *mBio.* Oct 6 2020;11(5).

- 768 **12.** Coyne MJ, Weinacht KG, Krinos CM, Comstock LE. Mpi recombinase globally  
769 modulates the surface architecture of a human commensal bacterium. *Proc Natl Acad Sci*  
770 *USA*. 2003;100(18):10446-10451.
- 771 **13.** Gunther NWt, Snyder JA, Lockatell V, Blomfield I, Johnson DE, Mobley HL.  
772 Assessment of virulence of uropathogenic *Escherichia coli* type 1 fimbrial mutants in  
773 which the invertible element is phase-locked on or off. *Infect Immun*. Jul  
774 2002;70(7):3344-3354.
- 775 **14.** Snyder JA, Lloyd AL, Lockatell CV, Johnson DE, Mobley HL. Role of phase variation  
776 of type 1 fimbriae in a uropathogenic *Escherichia coli* cystitis isolate during urinary tract  
777 infection. *Infect Immun*. 2006;74(2):1387-1393.
- 778 **15.** Just I, Selzer J, Wilm M, von Eichel-Streiber C, Mann M, Aktories K. Glucosylation of  
779 Rho proteins by *Clostridium difficile* toxin B. *Nature*. Jun 8 1995;375(6531):500-503.
- 780 **16.** Just I, Wilm M, Selzer J, et al. The enterotoxin from *Clostridium difficile* (ToxA)  
781 monoglucosylates the Rho proteins. *J Biol Chem*. Jun 9 1995;270(23):13932-13936.
- 782 **17.** Chandrasekaran R, Lacy DB. The role of toxins in *Clostridium difficile* infection. *FEMS*  
783 *Microbiol Rev*. Nov 1 2017;41(6):723-750.
- 784 **18.** Shen A. *Clostridium difficile* toxins: mediators of inflammation. *J Innate Immun*.  
785 2012;4(2):149-158.
- 786 **19.** Lyras D, O'Connor JR, Howarth PM, et al. Toxin B is essential for virulence of  
787 *Clostridium difficile*. *Nature*. 2009;458(7242):1176-1179.
- 788 **20.** Kuehne SA, Cartman ST, Heap JT, Kelly ML, Cockayne A, Minton NP. The role of  
789 toxin A and toxin B in *Clostridium difficile* infection. *Nature*. 2010;467(7316):711-713.
- 790 **21.** Carter GP, Chakravorty A, Pham Nguyen TA, et al. Defining the Roles of TcdA and  
791 TcdB in Localized Gastrointestinal Disease, Systemic Organ Damage, and the Host  
792 Response during *Clostridium difficile* Infections. *mBio*. 2015;6(3):e00551-00515.
- 793 **22.** Emerson JE, Reynolds CB, Fagan RP, Shaw HA, Goulding D, Fairweather NF. A novel  
794 genetic switch controls phase variable expression of CwpV, a *Clostridium difficile* cell  
795 wall protein. *Mol Microbiol*. 2009;74(3):541-556.
- 796 **23.** Anjuwon-Foster BR, Tamayo R. A genetic switch controls the production of flagella and  
797 toxins in *Clostridium difficile*. *PLoS Genet*. Mar 2017;13(3):e1006701.
- 798 **24.** Sekulovic O, Mathias Garrett E, Bourgeois J, Tamayo R, Shen A, Camilli A. Genome-  
799 wide detection of conservative site-specific recombination in bacteria. *PLoS Genet*. Apr  
800 2018;14(4):e1007332.
- 801 **25.** Anjuwon-Foster BR, Maldonado-Vazquez N, Tamayo R. Characterization of flagellar  
802 and toxin phase variation in *Clostridioides difficile* ribotype 012 isolates. *J Bacteriol*. May  
803 7 2018;200(4): e00056-00018.
- 804 **26.** Garrett EM, Sekulovic O, Wetzel D, et al. Phase variation of a signal transduction system  
805 controls *Clostridioides difficile* colony morphology, motility, and virulence. *PloS Biol*.  
806 Oct 2019;17(10): e3000379.
- 807 **27.** Grindley NDF, Whiteson KL, Rice PA. Mechanisms of site-specific recombination. *Ann*  
808 *Rev Biochem*. 2006;75:567-605.
- 809 **28.** Johnson RC. Site-specific DNA Inversion by Serine Recombinases. *Microbiol Spectr*.  
810 2015;3(1):MDNA3-0047-2014.
- 811 **29.** Sekulovic O, Bourgeois J, Shen A, Camilli A. Expanding the repertoire of conservative  
812 site-specific recombination in *Clostridioides difficile*. *Anaerobe*. Dec 2019;60:102073.

- 813 **30.** Reynolds CB, Emerson JE, de la Riva L, Fagan RP, Fairweather NF. The *Clostridium*  
814 *difficile* cell wall protein CwpV is antigenically variable between strains, but exhibits  
815 conserved aggregation-promoting function. *PLoS Pathog.* 2011;7(4):e1002024.
- 816 **31.** Anjuwon-Foster BR, Tamayo R. Phase variation of *Clostridium difficile* virulence  
817 factors. *Gut Microbes.* Jan 2 2018;9(1):76-83.
- 818 **32.** Aubry A, Hussack G, Chen W, et al. Modulation of toxin production by the flagellar  
819 regulon in *Clostridium difficile*. *Infect Immun.* 2012;80(10):3521-3532.
- 820 **33.** Baban ST, Kuehne SA, Barketi-Klai A, et al. The role of flagella in *Clostridium difficile*  
821 pathogenesis: comparison between a non-epidemic and an epidemic strain. *PloS One.*  
822 2013;8(9):e73026.
- 823 **34.** Faulds-Pain A, Twine SM, Vinogradov E, et al. The post-translational modification of the  
824 *Clostridium difficile* flagellin affects motility, cell surface properties and virulence. *Mol*  
825 *Microbiol.* 2014;94(2):272-289.
- 826 **35.** Stevenson E, Minton NP, Kuehne SA. The role of flagella in *Clostridium difficile*  
827 pathogenicity. *Trends Microbiol.* 2015;23(5):275-282.
- 828 **36.** Stabler RA, He M, Dawson L, et al. Comparative genome and phenotypic analysis of  
829 *Clostridium difficile* 027 strains provides insight into the evolution of a hypervirulent  
830 bacterium. *Genome Biol.* 2009;10(9):R102.
- 831 **37.** Purcell EB, McKee RW, McBride SM, Waters CM, Tamayo R. Cyclic diguanylate  
832 inversely regulates motility and aggregation in *Clostridium difficile*. *J Bacteriol.*  
833 2012;194(13):3307-3316.
- 834 **38.** McKee RW, Mangalea MR, Purcell EB, Borchardt EK, Tamayo R. The second  
835 messenger cyclic di-GMP regulates *Clostridium difficile* toxin production by controlling  
836 expression of *sigD*. *J Bacteriol.* 2013;195(22):5174-5185.
- 837 **39.** El Meouche I, Peltier J, Monot M, et al. Characterization of the SigD regulon of *C.*  
838 *difficile* and its positive control of toxin production through the regulation of *tcdR*. *PloS*  
839 *One.* 2013;8(12):e83748.
- 840 **40.** Mani N, Dupuy B. Regulation of toxin synthesis in *Clostridium difficile* by an alternative  
841 RNA polymerase sigma factor. *Proc Natl Acad Sci USA.* 2001;98(10):5844-5849.
- 842 **41.** Trzilova D, Anjuwon-Foster BR, Rivera DT, Tamayo R. Rho factor mediates flagellum  
843 and toxin phase variation and impacts virulence in *Clostridioides difficile*. *Plos Pathog.*  
844 Aug 2020;16(8):e1008708.
- 845 **42.** Trzilova D, Tamayo R. Site-Specific Recombination - How Simple DNA Inversions  
846 Produce Complex Phenotypic Heterogeneity in Bacterial Populations. *Trends Genet.* Jan  
847 2021;37(1):59-72.
- 848 **43.** Gally DL, Leathart J, Blomfield IC. Interaction of FimB and FimE with the *fim* switch  
849 that controls the phase variation of type 1 fimbriae in *Escherichia coli* K-12. *Mol*  
850 *Microbiol.* 1996;21(4):725-738.
- 851 **44.** Kuehne SA, Collery MM, Kelly ML, Cartman ST, Cockayne A, Minton NP. Importance  
852 of toxin A, toxin B, and CDT in virulence of an epidemic *Clostridium difficile* strain. *J*  
853 *Infect Dis.* Jan 1 2014;209(1):83-86.
- 854 **45.** Winston JA, Thanissery R, Montgomery SA, Theriot CM. Cefoperazone-treated Mouse  
855 Model of Clinically-relevant *Clostridium difficile* Strain R20291. *J Vis Exp.* Dec 10  
856 2016(118).
- 857 **46.** Chen X, Katchar K, Goldsmith JD, et al. A mouse model of *Clostridium difficile*-  
858 associated disease. *Gastroenterol.* 2008;135(6):1984-1992.

- 859 47. Warny M, Pepin J, Fang A, et al. Toxin production by an emerging strain of *Clostridium*  
860 *difficile* associated with outbreaks of severe disease in North America and Europe.  
861 *Lancet*. 2005;366(9491):1079-1084.
- 862 48. Dingle TC, Mulvey GL, Armstrong GD. Mutagenic analysis of the *Clostridium difficile*  
863 flagellar proteins, FliC and FliD, and their contribution to virulence in hamsters. *Infect*  
864 *Immun*. 2011;79(10):4061-4067.
- 865 49. Saujet L, Monot M, Dupuy B, Soutourina O, Martin-Verstraete I. The key sigma factor of  
866 transition phase, SigH, controls sporulation, metabolism, and virulence factor expression  
867 in *Clostridium difficile*. *J Bacteriol*. 2011;193(13):3186-3196.
- 868 50. Deakin LJ, Clare S, Fagan RP, et al. The *Clostridium difficile spo0A* Gene Is a  
869 Persistence and Transmission Factor. *Infect Immun*. 2012;80(8):2704-2711.
- 870 51. Pettit LJ, Browne HP, Yu L, et al. Functional genomics reveals that *Clostridium difficile*  
871 Spo0A coordinates sporulation, virulence and metabolism. *BMC Genom*. 2014;15:160-  
872 2164-2115-2160.
- 873 52. Edwards AN, Tamayo R, McBride SM. A novel regulator controls *Clostridium difficile*  
874 sporulation, motility and toxin production. *Mol Microbiol*. Jun 2016;100(6):954-971.
- 875 53. Girinathan BP, Ou J, Dupuy B, Govind R. Pleiotropic roles of *Clostridium difficile sin*  
876 locus. *PLoS Pathog*. Mar 2018;14(3):e1006940.
- 877 54. Yoshino Y, Kitazawa T, Ikeda M, et al. *Clostridium difficile* flagellin stimulates toll-like  
878 receptor 5, and toxin B promotes flagellin-induced chemokine production via TLR5. *Life*  
879 *Sci*. 2012;92(3):211-217.
- 880 55. Batah J, Deneve-Larrazet C, Jolivot PA, et al. *Clostridium difficile* flagella predominantly  
881 activate TLR5-linked NF-kappaB pathway in epithelial cells. *Anaerobe*. Apr  
882 2016;38:116-124.
- 883 56. Batah J, Kobeissy H, Bui Pham PT, et al. *Clostridium difficile* flagella induce a pro-  
884 inflammatory response in intestinal epithelium of mice in cooperation with toxins. *Sci*  
885 *Rep*. Jun 12 2017;7(1):3256.
- 886 57. Crobach MJ, Planche T, Eckert C, et al. European Society of Clinical Microbiology and  
887 Infectious Diseases: update of the diagnostic guidance document for *Clostridium difficile*  
888 infection. *Clin Microbiol Infect*. Aug 2016;22 Suppl 4:S63-81.
- 889 58. Peltier J, Hamiot A, Garneau JR, et al. Type I toxin-antitoxin systems contribute to the  
890 maintenance of mobile genetic elements in *Clostridioides difficile*. *Commun Biol*. Nov 27  
891 2020;3(1):718.
- 892 59. Kirk JA, Fagan RP. Heat shock increases conjugation efficiency in *Clostridium difficile*.  
893 *Anaerobe*. Dec 2016;42:1-5.
- 894 60. Bouillaut L, McBride SM, Sorg JA. Genetic Manipulation of *Clostridium difficile*. *Curr*  
895 *Protoc Microbiol*. 2011;Unit 9A.2:1-17.
- 896 61. Purcell EB, McKee RW, Courson DS, et al. A nutrient-regulated cyclic diguanylate  
897 phosphodiesterase controls *Clostridium difficile* biofilm and toxin production during  
898 stationary phase. *Infect Immun*. 2017;85(9):pii: e00347-00317.
- 899 62. Putnam EE, Nock AM, Lawley TD, Shen A. SpoIVA and SipL are *Clostridium difficile*  
900 spore morphogenetic proteins. *J Bacteriol*. 2013;195(6):1214-1225.
- 901 63. Edwards AN, McBride SM. Isolating and Purifying *Clostridium difficile* Spores. *Methods*  
902 *Mol Biol*. 2016;1476:117-128.
- 903 64. Edwards AN, McBride SM. Determination of the in vitro Sporulation Frequency of  
904 *Clostridium difficile*. *Bio Protoc*. Feb 5 2017;7(3).

- 905 **65.** Shrestha R, Sorg JA. Hierarchical recognition of amino acid co-germinants during  
906 *Clostridioides difficile* spore germination. *Anaerobe*. Feb 2018;49:41-47.
- 907 **66.** George WL, Sutter VL, Citron D, Finegold SM. Selective and differential medium for  
908 isolation of *Clostridium difficile*. *J Clin Microbiol*. Feb 1979;9(2):214-219.
- 909 **67.** Wilson KH, Kennedy MJ, Fekety FR. Use of sodium taurocholate to enhance spore  
910 recovery on a medium selective for *Clostridium difficile*. *J Clin Microbiol*. Mar  
911 1982;15(3):443-446.
- 912 **68.** Oliveira PH, Ribis JW, Garrett EM, et al. Epigenomic characterization of *Clostridioides*  
913 *difficile* finds a conserved DNA methyltransferase that mediates sporulation and  
914 pathogenesis. *Nat Microbiol*. Jan 2020;5(1):166-+.
- 915 **69.** McKee RW, Aleksanyan N, Garrett EM, Tamayo R. Type IV pili promote *Clostridium*  
916 *difficile* adherence and persistence in a mouse model of infection. *Infect Immun*.  
917 2018;86(5):pii: e00943-00917.
- 918
- 919

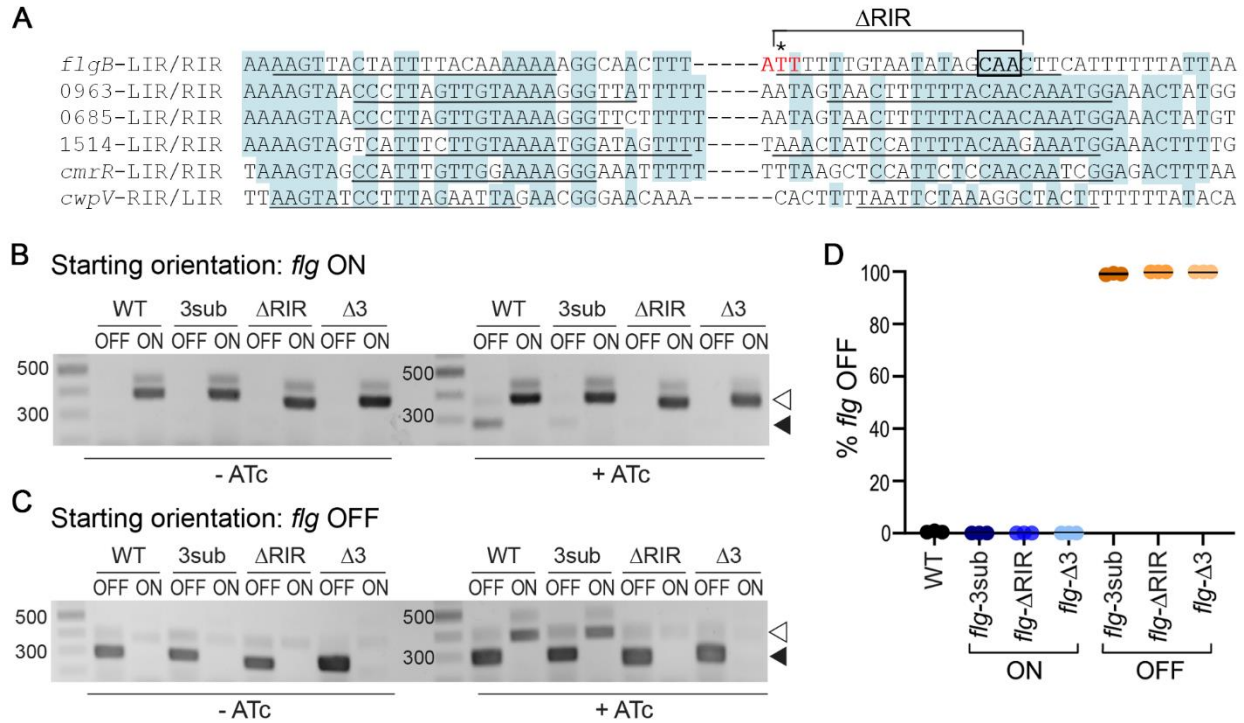

920

921 **Figure 1. Mutations in *flg* RIR affect inversion in *E. coli* and *C. difficile*.** A. Alignment of  
 922 inverted repeats flanking the invertible DNA sequences affected by RecV. Shading denotes  
 923 residues conserved in at least 4 of the 6 repeats. Putative inverted repeats are underlined.  
 924 Hyphens between LIRs and RIRs represent the intervening sequences, which vary in length and  
 925 nucleotide sequence. For the *flgB*-RIR, the site of cleavage by RecV is indicated with an asterisk.  
 926 This nucleotide and the two adjacent residues, indicated in red, were deleted in *flg*-Δ3  
 927 constructs/strains. Note that the adenine 5' of the cleavage site is present in the *flg* ON sequence,  
 928 whereas a thymine is present in *flg* OFF; constructs for mutagenesis were created in both *flg*  
 929 orientations. The conserved CAA nucleotides mutated in *flg*-3sub constructs/strains are boxed in  
 930 black. Nucleotides deleted in *flg*-ΔRIR bacteria/constructs are indicated. LIR, RIR = left, right  
 931 inverted repeats. Numbers indicate locus tags in *C. difficile* R20291. B, C. Orientation-specific  
 932 PCR to examine flagellar switch inversion in *E. coli* bearing wild-type or mutated inverted repeat  
 933 target sequences. The starting orientation of the flagellar switch is indicated: *flg* ON (B) or *flg*  
 934 OFF (C). Absence or presence of ATc for induction of *recV* expression is shown (-ATc/+ATc).  
 935 The *flg* ON and *flg* OFF products are indicated with white and black arrows, respectively. Shown  
 936 are representative images of three independent experiments. (D) Analysis of flagellar switch  
 937 orientation in *C. difficile* RIR mutants by quantitative orientation-specific PCR. Means and  
 938 standard deviations for three biological replicates are shown.

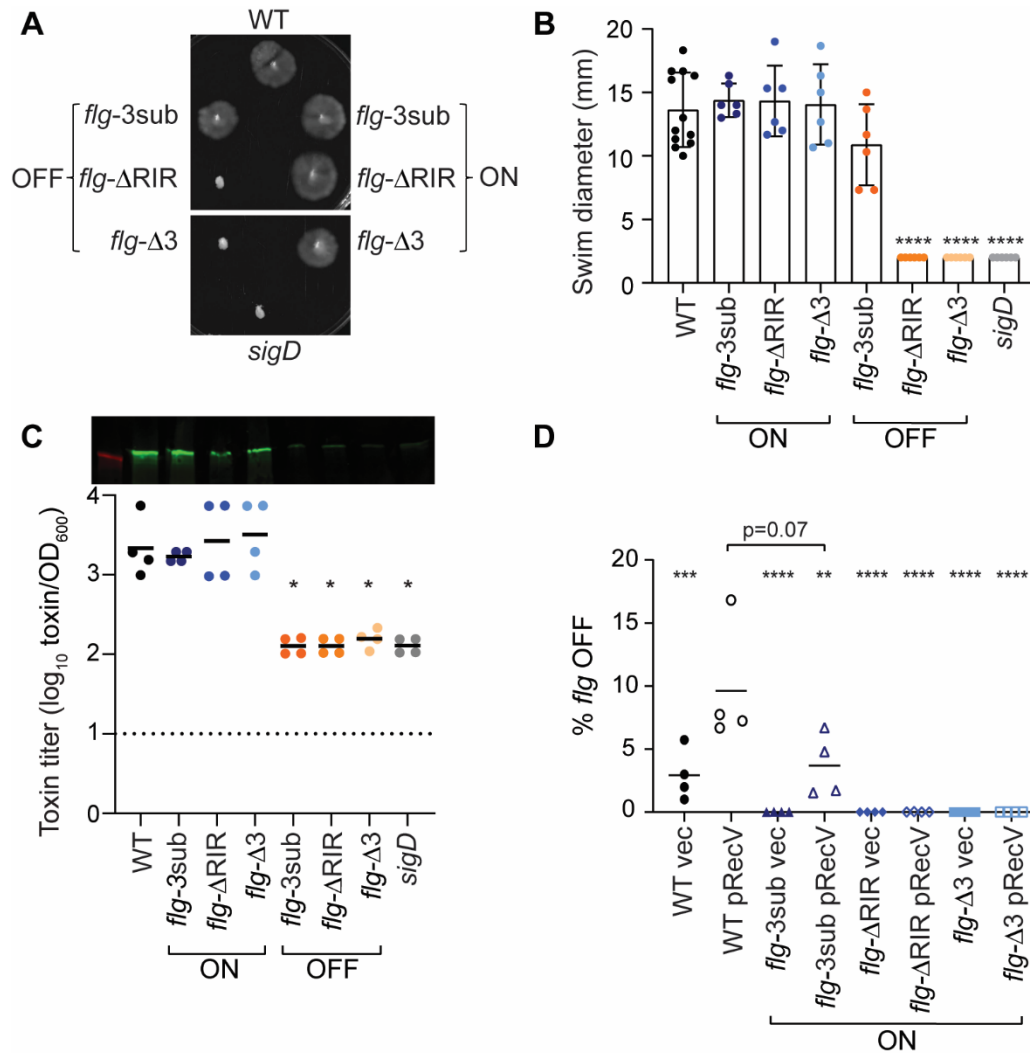

939

940 **Figure 2. Mutations in *flg* RIR affect *C. difficile* motility and toxin production.** (A)

941 Representative image of swimming motility in soft agar medium of *C. difficile* R20291 (WT),  
 942 *flg-3sub* ON and OFF, *flg-ΔRIR* ON and OFF, and *flg-Δ3* ON and OFF, and *sigD*-null non-  
 943 motile control, incubated for 48 hours. (B) Quantification of swimming motility after 48 h of  
 944 strains in (A). (C) Immunoblot detection of TcdA and toxin titers after growth in TY broth. For  
 945 immunoblot, a representative image of three independent experiments is shown. Toxin titers of  
 946 supernatants from overnight bacterial cultures were calculated as the reciprocal of the highest  
 947 dilution that causes  $\geq 80\%$  rounding of Vero cells, expressed after log-transformation and  
 948 normalization to  $OD_{600}$  of the cultures. (B, C) Each symbol represents one biological replicate,  
 949 and dotted line represents the limit of detection. \* $p < 0.05$  by one-way ANOVA with Dunnett's  
 950 post-test comparing values to *flg-Δ3* ON. (D) Quantitative orientation-specific PCR of the  
 951 flagellar switch in WT, *flg-3sub* ON, *flg-ΔRIR* ON, and *flg-Δ3* ON mutants expressing *recV*  
 952 (pRecV) or bearing vector. Means and standard deviations are shown. \*\*\*\* $p < 0.0001$ ,  
 953 \*\*\* $p < 0.001$ , \*\* $p < 0.01$  by one-way ANOVA and Dunnett's post-test comparing values to WT  
 954 pRecV. P value for comparison of WT pRecV and *flg-3sub* ON pRecV was determined by  
 955 unpaired two-tailed t-test. (B-D) Means and standard deviations are shown.



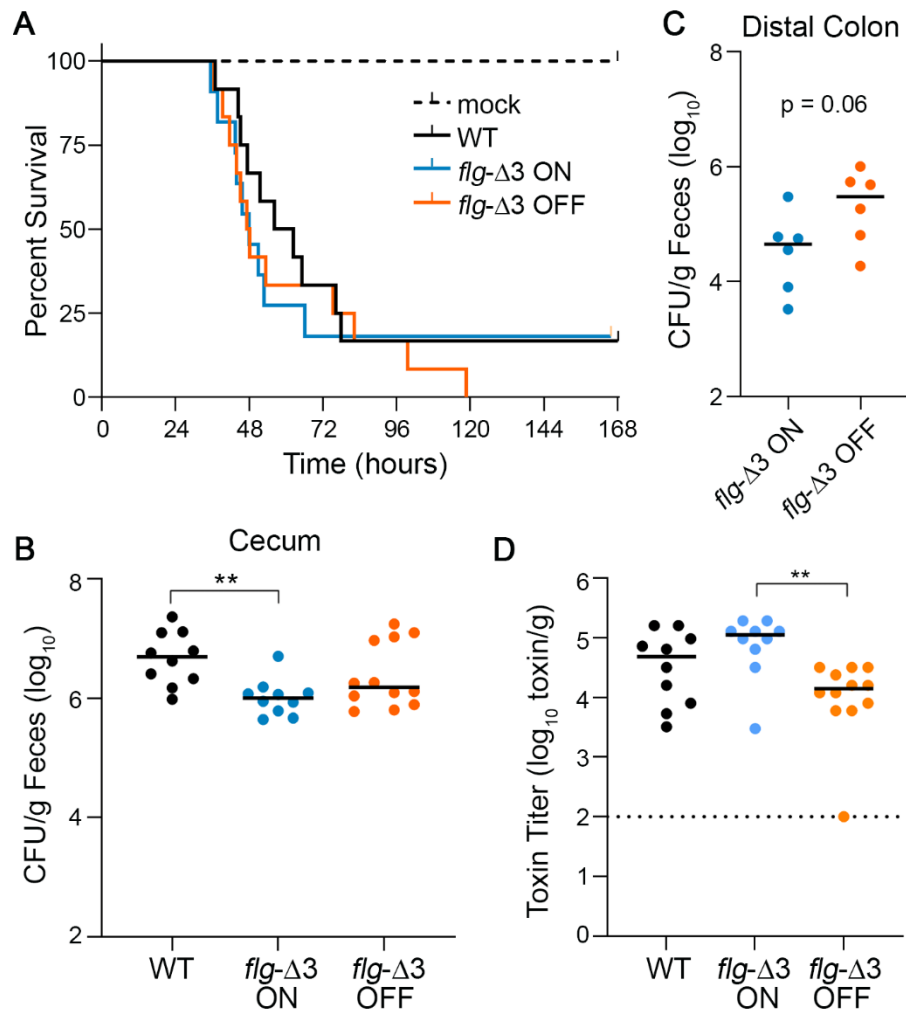

956

957 **Figure 3. Interfering with flagellar switch inversion affects toxin accumulation and**  
 958 **bacterial burden in a hamster model of CDI.** Antibiotic-treated male and female Syrian  
 959 Golden hamsters were inoculated with 1000 spores of wild-type R20291 (WT), *flg-Δ3* ON, and  
 960 *flg-Δ3* OFF. Mock-inoculated animals were included in each experiment. Data are combined  
 961 from two independent experiments testing strains in 3 male and 3 female hamsters, for 12 total  
 962 hamsters per strain. (A) Kaplan-Meier analysis of survival. (B) CFU in cecal contents. **\*\*** $p < 0.01$   
 963 by Kruskal-Wallis test with Dunn's post-test. (C) CFU from homogenized distal colon from six  
 964 animals of one experiment. P value was determined by Mann-Whitney test. (D) Toxin titers in  
 965 cecal contents calculated as the reciprocal of the highest dilution to cause  $\geq 80\%$  rounding of  
 966 Vero cells. No cell rounding occurred when treated with diluted cecal contents from mock-  
 967 inoculated animals. Bars indicate the means; dotted line represents the limit of detection.  
 968 **\*\*** $p < 0.01$  with Kruskal-Wallis test with Dunn's post-test. (B, C, D) Symbols indicate CFU from  
 969 individual animals and bars indicate medians.

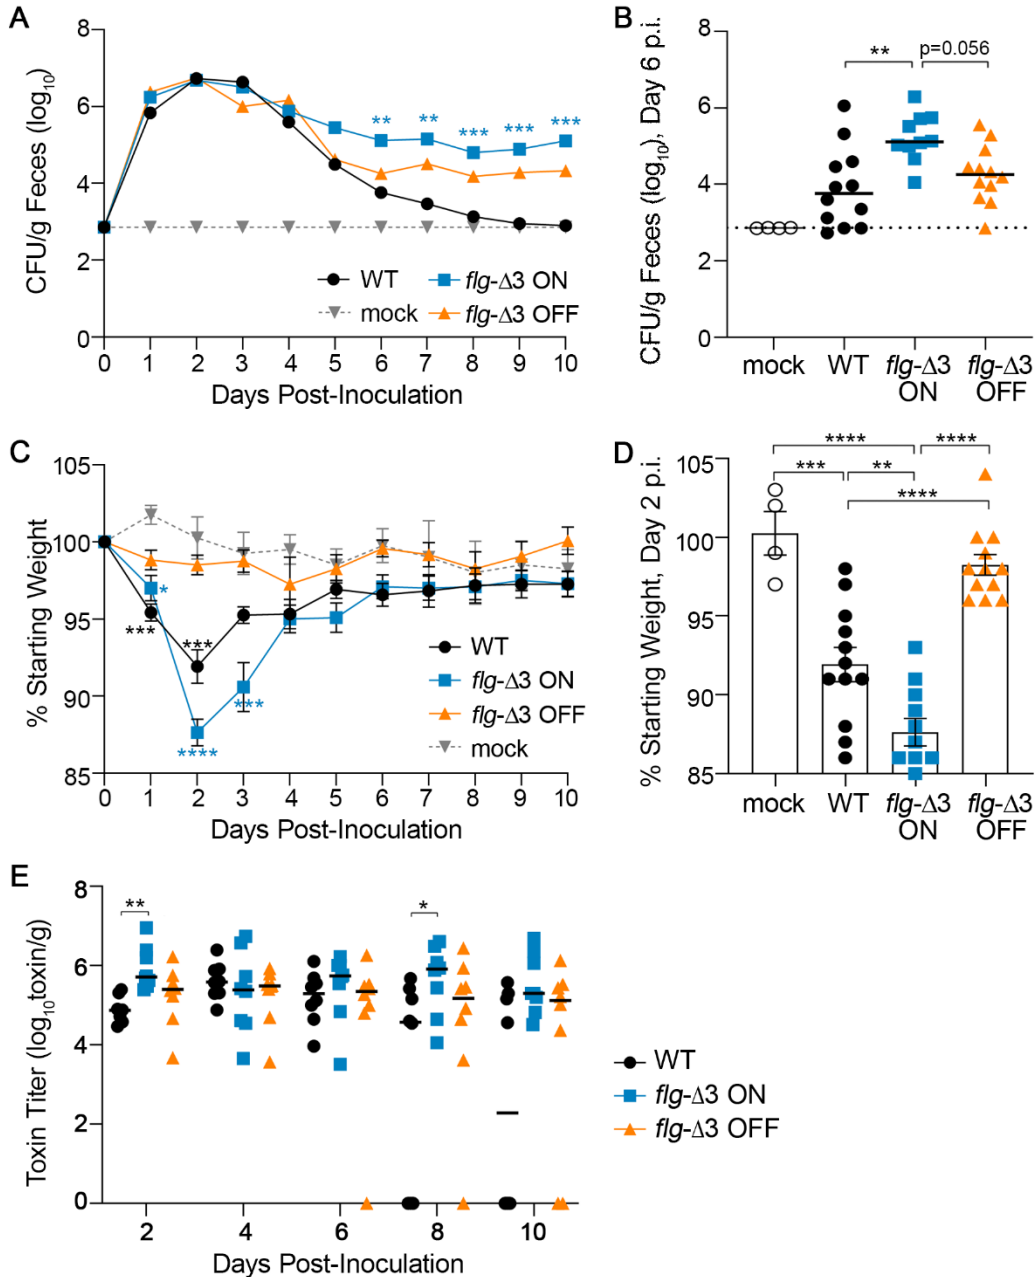

970

971 **Figure 4. Locking the flagellar switch in the ON orientation exacerbates disease and**  
 972 **increases persistence of *C. difficile* in a mouse model of CDI.** Antibiotic-treated male and  
 973 female C57BL/6 mice were inoculated with 100,000 spores of wild-type R20291 (WT), *flg*- $\Delta$ 3  
 974 ON, and *flg*- $\Delta$ 3 OFF. Mock-inoculated animals were included in each experiment. Data are  
 975 combined from two independent experiments testing strains in 3 male and 3 female mice, for 12  
 976 total mice per strain. (A) CFU enumerated in fecal samples collected every 24 hours post-  
 977 inoculation (p.i.). Asterisks indicate statistical comparison to WT data at that time point. (B)  
 978 CFU per gram feces collected on day 6 p.i.; data for days 5 - 10 shown in Figure S4. Symbols in  
 979 each group distinguish results from two independent experiments. (C) Animal weights

980 determined every 24 hours post-inoculation, expressed as a percentage of the mouse's weight at  
981 day 0. Asterisks indicate statistical comparison to mock data at that time point. (D) Animal  
982 weights at Day 2 p.i.; data for days 1 - 6 shown in Figure S5. (E) Toxin titers in fecal samples  
983 calculated as the reciprocal of the highest dilution to cause  $\geq 80\%$  rounding of Vero cells. No cell  
984 rounding occurred when treated with diluted fecal contents from mock-inoculated animals. (A-E)  
985 Symbols indicate values from individual animals; dotted lines represent limit of detection. (A, B,  
986 E) Bars indicate the medians. Statistical significance was determined using the Kruskal-Wallis  
987 test and Dunn's post-test. (C, D) Bars indicate means and standard error. Statistical significance  
988 was determined by one-way ANOVA with Tukey's post-test. \* $p < 0.05$ , \*\* $p < 0.01$ , \*\*\* $p < 0.001$ ,  
989 \*\*\*\* $p < 0.0001$ .
