# Supplementary material for: Flagellum and toxin phase variation impacts intestinal colonization and disease development in a mouse model of Clostridioides difficile infection
Source: bioRxiv or medRxiv preprint supplement (doi:10.1101/2021.09.29.462200), 2021-09-29
Supplement: Supplementary file [file media-1.pdf]

## SUPPLEMENTAL DATA

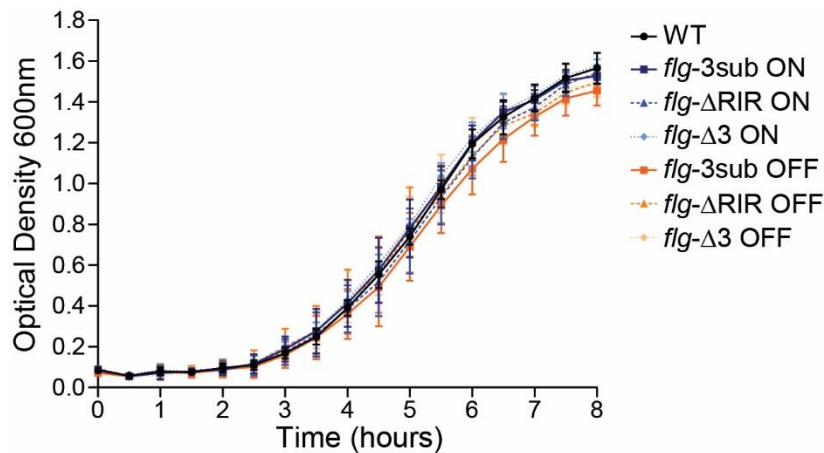

**Figure S1. Mutations in *flg* RIR do not affect growth.** Growth curves of WT, *flg* ON and OFF (3sub,  $\Delta$ RIR,  $\Delta$ 3) mutants. Overnight cultures grown in TY medium were diluted 1:50 into BHIS broth. Optical density ( $OD_{600}$ ) was measured every 30 minutes for 8 hours. Shown are the means and standard deviations for 6 biological replicates.

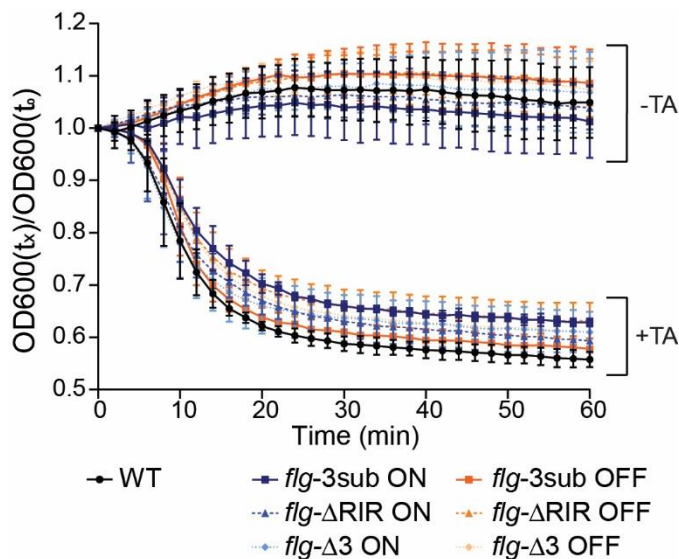

**Figure S2. Mutations in the flagellar switch RIR do not affect germination.** Purified spores of indicated strains were germinated in the presence of taurocholate (+) or in buffer without germinant as a control (-), and optical density ( $OD_{600}$ ) was measured. Germination was plotted as the ratio of optical density ( $OD_{600}$ ) at a given time point ( $t_x$ ) versus initial  $OD_{600}$  ( $t_0$ ). A representative germination plot of six independent experiments each consisting of 2 technical replicates is shown. Means and standard deviations are shown.

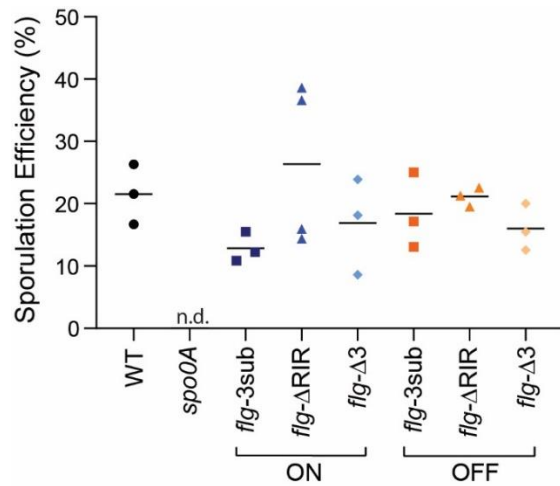

**Figure S3. Mutations in the flagellar switch RIR do not affect sporulation.** Sporulation efficiency was evaluated by ethanol resistance and calculated as the total number of spores divided by the total number of viable cells (spores plus vegetative). A sporulation-deficient *spo0A* mutant was included as a control. The means and standard deviations of three independent experiments are shown. n.d. – none detected. No significant differences by one-way ANOVA other than for the *spo0A* control.

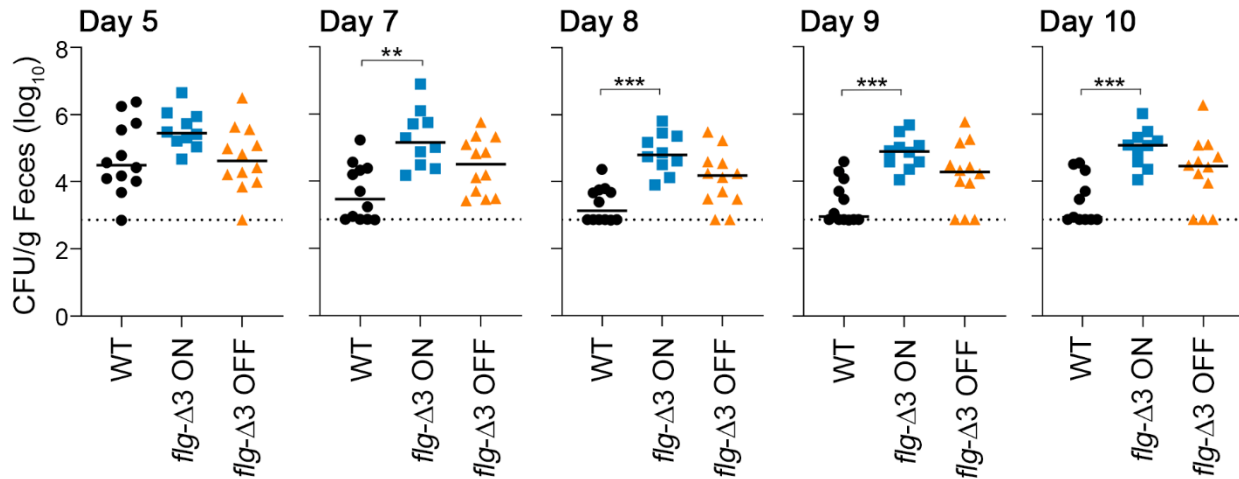

**Figure S4. Bacterial load in feces collected from mice inoculated with WT, *flg-Δ3* ON, and *flg-Δ3* OFF.** CFU enumerated in fecal samples collected every 24 hours p.i., with data in Figure 4A separated by day. Day 6 data are shown in Figure 4B. Two independent experiments with  $n = 6$  (3 male, 3 female) were done and the data combined for  $n = 12$ . Bars indicate the medians, and dotted lines represent the limit of detection. No CFU were detected in feces of mock-inoculated mice. \*\* $p < 0.01$ , \*\*\* $p < 0.001$ , by Kruskal-Wallis test with Dunn's post-test comparing all strains.

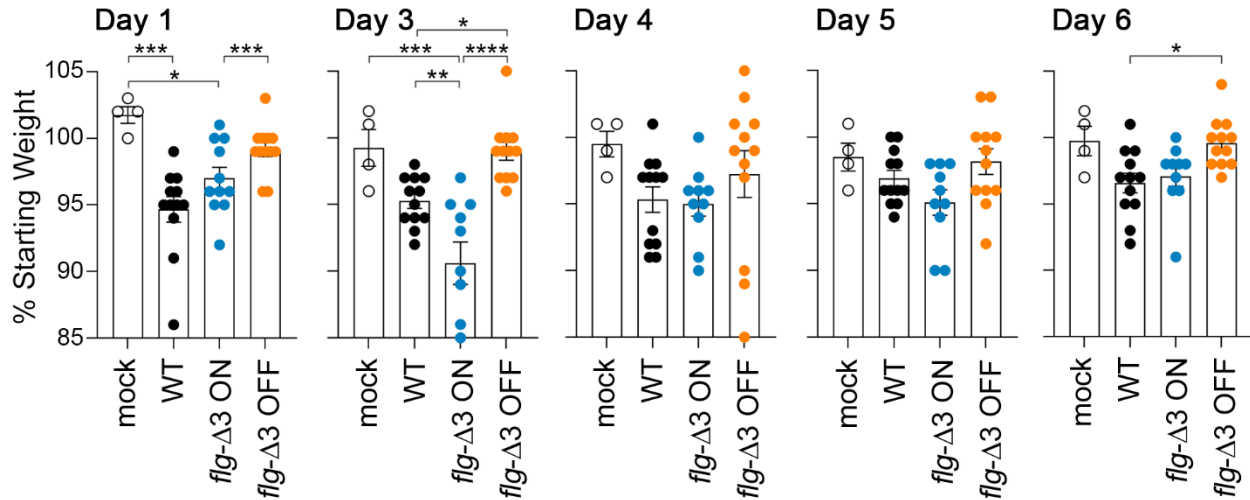

**Figure S5. The *flg-Δ3* ON mutant elicits increased weight loss in mice.** Animal weights measured every 24 hours post-inoculation expressed as a percentage of the mouse's starting weight at day 0, with data from Figure 4C separated by day; day 2 data are shown in Figure 4D. Two independent experiments with  $n = 6$  (3 male, 3 female) were done and the data combined for  $n = 12$ . Symbols represent values from individual animals, and bars indicate the means and standard error. \* $p < 0.05$ , \*\* $p < 0.01$ , \*\*\* $p < 0.001$  by one-way ANOVA with Tukey's post-test comparing all strains.
