# Supplementary material for: Flagellum and toxin phase variation impacts intestinal colonization and disease development in a mouse model of Clostridioides difficile infection
Source: bioRxiv or medRxiv preprint supplement (doi:10.1101/2021.09.29.462200), 2021-09-29
Supplement: Supplementary file [file media-2.pdf]

**Table S1. Strains and plasmids used in this study**

| <b><i>Clostridioides difficile</i> strains</b> |                                         |                                                                                                                |                   |
|------------------------------------------------|-----------------------------------------|----------------------------------------------------------------------------------------------------------------|-------------------|
| <b>Lab Notation</b>                            | <b>Strain Name</b>                      | <b>Description</b>                                                                                             | <b>Reference</b>  |
| RT273                                          | <i>C. difficile</i><br>R20291           | Ribotype 027 strain                                                                                            | (1)               |
| RT1693                                         | <i>recV flg</i> OFF                     | R20291 <i>recV::ermB (flgB UTR<sup>OFF</sup>)</i>                                                              | (2, 3)            |
| RT1702                                         | <i>recV flg</i> ON                      | R20291 <i>recV::ermB (flgB UTR<sup>ON</sup>)</i>                                                               | (2)               |
| RT1566                                         | <i>sigD</i>                             | R20291 <i>sigD::ermB</i>                                                                                       | (2)               |
| RT1658                                         | <i>spo0A</i>                            | R20291 <i>spo0A::ermB</i>                                                                                      | (4)               |
| RT2555                                         | <i>flgBΔUTR</i>                         | R20291 <i>flgBΔUTR</i>                                                                                         | This work         |
| RT2603                                         | <i>flg-3sub</i> OFF                     | R20291 <i>flg-3sub</i> OFF                                                                                     | This work         |
| RT2604                                         | <i>flg-ΔRIR</i> OFF                     | R20291 <i>flg-ΔRIR</i> OFF                                                                                     | This work         |
| RT2609                                         | <i>flg-Δ3</i> OFF                       | R20291 <i>flg-Δ3</i> OFF                                                                                       | This work         |
| RT2610                                         | <i>flg-3sub</i> ON                      | R20291 <i>flg-3sub</i> ON                                                                                      | This work         |
| RT2611                                         | <i>flg-ΔRIR</i> ON                      | R20291 <i>flg-ΔRIR</i> ON                                                                                      | This work         |
| RT2612                                         | <i>flg-Δ3</i> ON                        | R20291 <i>flg-Δ3</i> ON                                                                                        | This work         |
| RT2196                                         | WT vec                                  | R20291 with pRT1611 (vector control)                                                                           | (5)               |
| RT1562                                         | WT pRecV                                | R20291 with pRT1611:: <i>recV</i>                                                                              | This work         |
| RT2614                                         | <i>flg-3sub</i> ON<br>vec               | R20291 <i>flg-3sub</i> ON with pRT1611                                                                         | This work         |
| RT2615                                         | <i>flg-3sub</i> ON<br>pRecV             | R20291 <i>flg-3sub</i> ON with pRT1611:: <i>recV</i>                                                           | This work         |
| RT2616                                         | <i>flg-ΔRIR</i> ON<br>vec               | R20291 <i>flg-ΔRIR</i> ON with pRT1611                                                                         | This work         |
| RT2617                                         | <i>flg-ΔRIR</i> ON<br>pRecV             | R20291 <i>flg-ΔRIR</i> ON with pRT1611:: <i>recV</i>                                                           | This work         |
| RT2618                                         | <i>flg-Δ3</i> ON vec                    | R20291 <i>flg-Δ3</i> ON with pRT1611                                                                           | This work         |
| RT2619                                         | <i>flg-Δ3</i> ON<br>pRecV               | R20291 <i>flg-Δ3</i> ON with pRT1611:: <i>recV</i>                                                             | This work         |
| <b><i>Escherichia coli</i> strains</b>         |                                         |                                                                                                                |                   |
| <b>Lab Notation</b>                            | <b>Strain Name</b>                      | <b>Description</b>                                                                                             | <b>Reference</b>  |
|                                                | <i>Escherichia coli</i><br>DH5α         | F- φ80 <i>lacZΔM15 Δ(lacZYA-argF)U169 recA1 endA1 hsdR17(rk -, mk+) phoA supE44 thi-1 gyrA96 relA1 λ- tonA</i> | Invitrogen<br>(6) |
| RT270                                          | <i>Escherichia coli</i><br>HB101(pRK24) | <i>E. coli</i> used in conjugations with <i>C. difficile</i> , Amp <sup>R</sup> , Cm <sup>R</sup>              | (7)               |
| RT1310                                         | pFig OFF<br>pRecV (Ec)                  | DH5α co-transformed with pRT1324 and pRT1164                                                                   | (2)               |
| RT2587                                         | pFig-3sub OFF<br>pRecV (Ec)             | DH5α co-transformed with pRT2582 and pRT1164                                                                   | This work         |
| RT2588                                         | pFig-ΔRIR OFF<br>pRecV (Ec)             | DH5α co-transformed with pRT2583 and pRT1164                                                                   | This work         |
| RT2589                                         | pFig-Δ3 OFF<br>pRecV (Ec)               | DH5α co-transformed with pRT2584 and pRT1164                                                                   | This work         |
| RT2602                                         | pFig ON pRecV<br>(Ec)                   | DH5α co-transformed with pRT1323 and pRT1164                                                                   | This work         |
| RT2590                                         | pFig-3sub ON<br>pRecV (Ec)              | DH5α co-transformed with pRT2585 and pRT1164                                                                   | This work         |
| RT2593                                         | pFig-ΔRIR ON<br>pRecV (Ec)              | DH5α co-transformed with pRT2592 and pRT1164                                                                   | This work         |
| RT2591                                         | pFig-Δ3 ON<br>pRecV (Ec)                | DH5α co-transformed with pRT2586 and pRT1164                                                                   | This work         |

| <b>Plasmids</b>     |                            |                                                                                                    |                 |
|---------------------|----------------------------|----------------------------------------------------------------------------------------------------|-----------------|
| <b>Lab notation</b> | <b>Plasmid Name</b>        | <b>Description</b>                                                                                 | <b>Citation</b> |
| pRT709              | pRPF185                    | pMTL960-derivative, contains ATc-inducible <i>P<sub>tet</sub></i> promoter                         | (8)             |
| pRT1611             | pRPF185 EV                 | <i>gusA</i> removed from pRPF185                                                                   | (2)             |
| pRT1529             | pRecV                      | pRT1611:: <i>recV</i>                                                                              | (2)             |
| pRT1391             | pMWO-074                   | Low copy vector with ATc-inducible <i>P<sub>tet</sub></i> promoter                                 | (9)             |
| pRT1164             | pRecV (Ec)                 | pMWO-074:: <i>recV</i>                                                                             | (2)             |
| pRT2460             | pMSR0                      | <i>E. coli</i> - <i>C. difficile</i> shuttle vector for toxin-mediated allele exchange mutagenesis | (10)            |
| pRT2546             | pMSR0<br><i>flgB</i> ΔUTR  | pMSR0 with construct for <i>flgB</i> UTR deletion                                                  | This work       |
| pRT2570             | pMSR0 <i>flg</i> -3sub OFF | pMSR0 with construct for <i>flg</i> -3sub OFF                                                      | This work       |
| pRT2571             | pMSR0 <i>flg</i> -ΔRIR OFF | pMSR0 with construct for <i>flg</i> -ΔRIR OFF                                                      | This work       |
| pRT2572             | pMSR0 <i>flg</i> -Δ3 OFF   | pMSR0 with construct for <i>flg</i> -Δ3 OFF                                                        | This work       |
| pRT2573             | pMSR0 <i>flg</i> -3sub ON  | pMSR0 with construct for <i>flg</i> -3sub ON                                                       | This work       |
| pRT2580             | pMSR0 <i>flg</i> -ΔRIR ON  | pMSR0 with construct for <i>flg</i> -ΔRIR ON                                                       | This work       |
| pRT2574             | pMSR0 <i>flg</i> -Δ3 ON    | pMSR0 with construct for <i>flg</i> -Δ3 ON                                                         | This work       |
| pRT264              | pMC123                     | pMC- <i>P<sub>cpr</sub></i> with nisin-inducible <i>cpr</i> promoter                               | (11)            |
| pRT1324             | pFlg OFF                   | pMC123:: <i>flg</i> OFF                                                                            | (2)             |
| pRT2582             | pFlg-3sub OFF              | pMC123:: <i>flg</i> -3sub OFF                                                                      | This work       |
| pRT2583             | pFlg-ΔRIR OFF              | pMC123:: <i>flg</i> -ΔRIR OFF                                                                      | This work       |
| pRT2584             | pFlg-Δ3 OFF                | pMC123:: <i>flg</i> -Δ3 OFF                                                                        | This work       |
| pRT1323             | pFlg ON                    | pMC123:: <i>flg</i> ON                                                                             | (2)             |
| pRT2585             | pFlg-3sub ON               | pMC123:: <i>flg</i> -3sub ON                                                                       | This work       |
| pRT2592             | pFlg-ΔRIR ON               | pMC123:: <i>flg</i> -ΔRIR ON                                                                       | This work       |
| pRT2586             | pFlg-Δ3 ON                 | pMC123:: <i>flg</i> -Δ3 ON                                                                         | This work       |

## References

1. Stabler RA, He M, Dawson L, Martin M, Valiente E, Corton C, Lawley TD, Sebaihia M, Quail MA, Rose G, Gerding DN, Gibert M, Popoff MR, Parkhill J, Dougan G, Wren BW. 2009. Comparative genome and phenotypic analysis of *Clostridium difficile* 027 strains provides insight into the evolution of a hypervirulent bacterium. *Genome Biol* 10:R102.
2. Anjuwon-Foster BR, Tamayo R. 2017. A genetic switch controls the production of flagella and toxins in *Clostridium difficile*. *PLoS Genet* 13:e1006701.
3. Sekulovic O, Ospina Bedoya M, Fivian-Hughes AS, Fairweather NF, Fortier LC. 2015. The *Clostridium difficile* cell wall protein CwpV confers phase-variable phage resistance. *Mol Microbiol* 98:329-342.

4. Edwards AN, Nawrocki KL, McBride SM. 2014. Conserved oligopeptide permeases modulate sporulation initiation in *Clostridium difficile*. *Infect Immun* 82:4276-4291.
5. Garrett EM, Sekulovic O, Wetzel D, Jones JB, Edwards AN, Vargas-Cuebas G, McBride SM, Tamayo R. 2019. Phase variation of a signal transduction system controls *Clostridioides difficile* colony morphology, motility, and virulence. *PLoS Biol* 17:e3000379.
6. Hanahan D. 1983. Studies on transformation of *Escherichia coli* with plasmids. *J Mol Biol* 166:557-80.
7. McBride SM, Sonenshein AL. 2011. Identification of a genetic locus responsible for antimicrobial peptide resistance in *Clostridium difficile*. *Infect Immun* 79:167-176.
8. Fagan RP, Fairweather NF. 2011. *Clostridium difficile* has two parallel and essential Sec secretion systems. *J Biol Chem* 286:27483-27493.
9. Obrist MW, Miller VL. 2012. Low copy expression vectors for use in *Yersinia* sp. and related organisms. *Plasmid* 68:33-42.
10. Peltier J, Hamiot A, Garneau JR, Boudry P, Maikova A, Hajnsdorf E, Fortier LC, Dupuy B, Soutourina O. 2020. Type I toxin-antitoxin systems contribute to the maintenance of mobile genetic elements in *Clostridioides difficile*. *Commun Biol* 3:718.
11. Purcell EB, McKee RW, Courson DS, Garrett EM, McBride SM, Cheney RE, Tamayo R. 2017. A nutrient-regulated cyclic diguanylate phosphodiesterase controls *Clostridium difficile* biofilm and toxin production during stationary phase. *Infect Immun* 85.
