# Supplementary material for: Flagellum and toxin phase variation impacts intestinal colonization and disease development in a mouse model of Clostridioides difficile infection
Source: bioRxiv or medRxiv preprint supplement (doi:10.1101/2021.09.29.462200), 2021-09-29
Supplement: Supplementary file [file media-3.pdf]

**Table S2. Oligonucleotides used in this study**

| Lab Notation | Primer name           | Sequence (5' to 3') <sup>a</sup>                                  | Reference |
|--------------|-----------------------|-------------------------------------------------------------------|-----------|
| R850         | rpoCqF                | CTAGCTGCTCCTATGTCTCACATC                                          | [97]      |
| R851         | rpoCqR                | CCAGTCTCTCCTGGATCAACTA                                            | [97]      |
| R2175        | flg_switchON_qF       | GTTTTCTTACCAAAGTGATACATTATTATATTA<br>ATG                          | [133]     |
| R2176        | flg_switchOFF_qF      | CATTAATATAATAATGTATCACTTTGGTAAGA<br>AAAC                          | [133]     |
| R2177        | flg_switch_qR         | GCTATTGTCTGACTTCTTAAATTAGTTGCAT                                   | [133]     |
| R2313        | flg_switch_F          | ATCACATTATGTAGTAAAAACACC                                          | This work |
| R2314        | flg_switch_R          | GTATTCACACTCACTCCTCC                                              | This work |
| R2462        | flgON_RIR_F           | ATATTAGTTTTCTTACCAAAGTGATAC                                       | This work |
| R2463        | flgOFF_RIR_F          | TAATAATGTATCACTTTGGTAAGAAAAC                                      | This work |
| R857         | flgBqR                | AGGCATAGCATCATTTAGTGTTTCTTC                                       | [97]      |
| R1614        | CDR20291_0248InvF     | AGGCAACTTTATAAAGAAATATTTAAATTTATA<br>TTAAAATATTTTTATATTTTTATTAGG  | [133]     |
| R1615        | CDR20291_0248InvR     | CCTAATAAAAATATAAAAATATTTTAAATATAAA<br>TTAAAATATTTCTTTATAAAGTTGCCT | [133]     |
| R2459        | flgB_UTR_F1           | CAGGAAACAGCTATGACCGCGGCCGCGATT<br>GTGCTCAATCTCATGG                | This work |
| R2448        | flgB_UTR_R1           | CACACTCACTCCTCCTCACTATTTAGTTTTAA<br>CTTAAGTATAACAATAAATAAC        | This work |
| R2449        | flgB_UTR_F2           | GTTATTTATTGTATACTTAAGTTAAAATAAAT<br>AGTGAGGAGGAGTGAGTGTG          | This work |
| R2450        | flgB_UTR_R2           | GATCGCGCATGTCTGCAGGCCTCGAGCTTAT<br>CAACTTCTGTTCTAGGTAC            | This work |
| R2672        | flgBΔUTR_screen_F     | GGAGATGCAGGAGCTATAG                                               | This work |
| R2741        | flgBΔUTR_F1           | CATTGATTTCTTTTCAGTTTCGGATCCTTGTGC<br>TCAATCTATGGG                 | This work |
| R2742        | flgBΔUTR_R2           | GACGTCGACTCTAGAGGATCCCATAGATAGC<br>TGTGCTTCTTGACC                 | This work |
| R2743        | pMSR0_screen_F        | GTGTTATCAATTGCACTACTCATGG                                         | This work |
| R2744        | pMSR0_screen_R        | GTTGAACCATTAGCTAAGGATTCAG                                         | This work |
| R2896        | flg_ΔUTR_insertion_F1 | GTGTCCATTGATTTCTTTTCAGTTTCGGATCCG<br>ATTGTGCTCAATCTCATGGAG        | This work |
| R2843        | flg_ΔUTR_insertion_R2 | CTTGCATGTCTGCAGGCCTCGAGATAGCTGT<br>GCTTCTTGAC                     | This work |
| R2882        | flgOFF_3nt subs_F2    | GTTGCCTTTTTTTGTAATATAGGTTCTTCATTT<br>TTTATTAATAAGC                | This work |
| R2883        | flgOFF_3nt subs_R1    | GCTTATTAATAAAAAATGAAGAACCTATATTA<br>CAAAAAAAGGCAAC                | This work |
| R2869        | flgOFF_ΔRIR_F2        | CTTTATAAAGTTGCCCTTCATTTTTTATTAATA<br>AGC                          | This work |
| R2870        | flgOFF_ΔRIR_R1        | GCTTATTAATAAAAAATGAAGGGCAACTTTAT<br>AAAG                          | This work |
| R2884        | flgOFF_Δ3nt_F2        | TATTTCTTTATAAAGTTGCCTTTTGTAAATATAG<br>CAACTTCATTTTTTATTAATAAG     | This work |
| R2885        | flgOFF_Δ3nt_R1        | AAAAAATGAAGTTGCTATATTACAAAAGGCAA<br>CTTTATAAAG                    | This work |
| R2888        | flgON_3nt subs_F2     | GAATAAAGAAGTCATTTTTTGTAAATATAGGTT<br>CTTCATTTTTTATTAATAAGC        | This work |
| R2889        | flgON_3nt subs_R1     | GCTTATTAATAAAAAATGAAGAACCTATATTA<br>CAAAAAATGACTTCTTTATTC         | This work |

|       |                   |                                                              |           |
|-------|-------------------|--------------------------------------------------------------|-----------|
| R2886 | flgON_ΔRIR_F2     | GTAATTAATTTGGATGAATAAAGAAGTCCTTC<br>ATTTTTTATTAATAAGC        | This work |
| R2887 | flgON_ΔRIR_R1     | GCTTATTAATAAAAAATGAAGGACTTCTTTAT<br>TCATCCAAATTAATTAC        | This work |
| R2890 | flgON_Δ3nt_F2     | GTAATTAATTTGGATGAATAAAGAAGTCTTTT<br>GTAATATAGCAACTTC         | This work |
| R2891 | flgON_Δ3nt_R1     | TAAAAAATGAAGTTGCTATATTACAAAAGACT<br>TCTTTATTCATCCAAATTAATTAC | This work |
| R1512 | CDR202_PflgBnew   | GTTCAAGCATGCGATATATTGTACAAATAAAA<br>TTGAAATATATGG            | [133]     |
| R1611 | CDR20291_0248CDSR | CAAGAATTCCTTACCTCCCACTTATTATTGA                              | [133]     |

<sup>a</sup> Restriction sites used for cloning are underlined
